# Supplementary material for: Pilot Production of Mesenchymal Stem/Stromal Freeze-Dried Secretome for Cell-Free Regenerative Nanomedicine: A Validated GMP-Compliant Process
Source: PubMed Central journal article supplement (PMC6262564; doi:10.3390/cells7110190), 2018-10-30
Supplement: cells-07-00190-s001.pdf [file cells-07-00190-s001.pdf]

1 **Supplementary materials:**  
2 **Pilot production of mesenchymal stem/stromal**  
3 **freeze-dried secretome for cell-free regenerative**  
4 **nanomedicine: a validated GMP-compliant process**

5 **Elia Bari, Sara Perteghella, Dario Di Silvestre, Marzio Sorlini, Laura Catenacci,**  
6 **Milena Sorrenti, Giorgio Marrubini, Rossana Rossi, Giuseppe Tripodo, Pierluigi**  
7 **Mauri, Mario Marazzi and Maria Luisa Torre**

8  
9

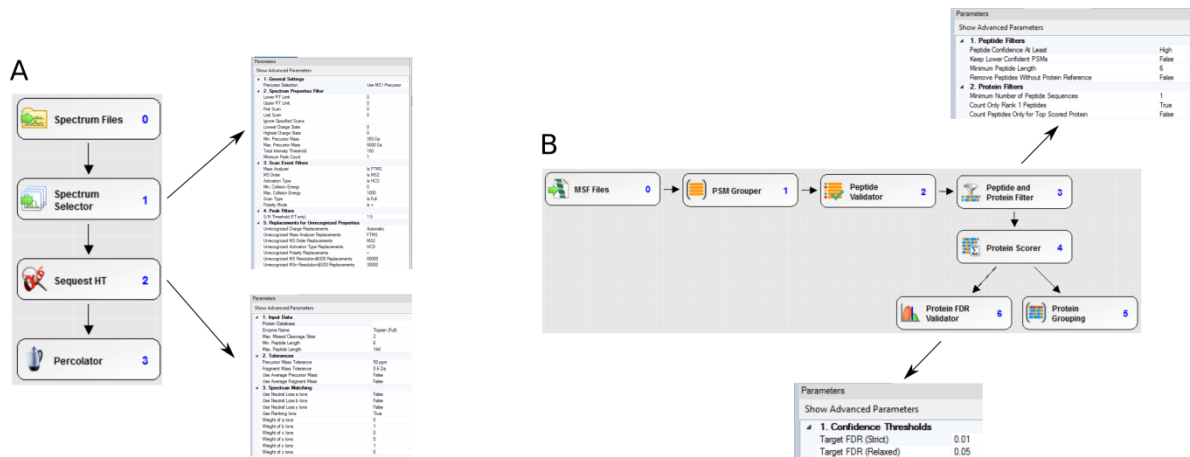

10  
11  
12  
13  
14  
15

Figure S1. Experimental MS/MS data processing workflows based on Discoverer 2.1 software. A) Processing workflow and parameters set for processing MS/MS spectra. B) Consensus workflow and parameters set for filtering the most confident proteins and peptides.

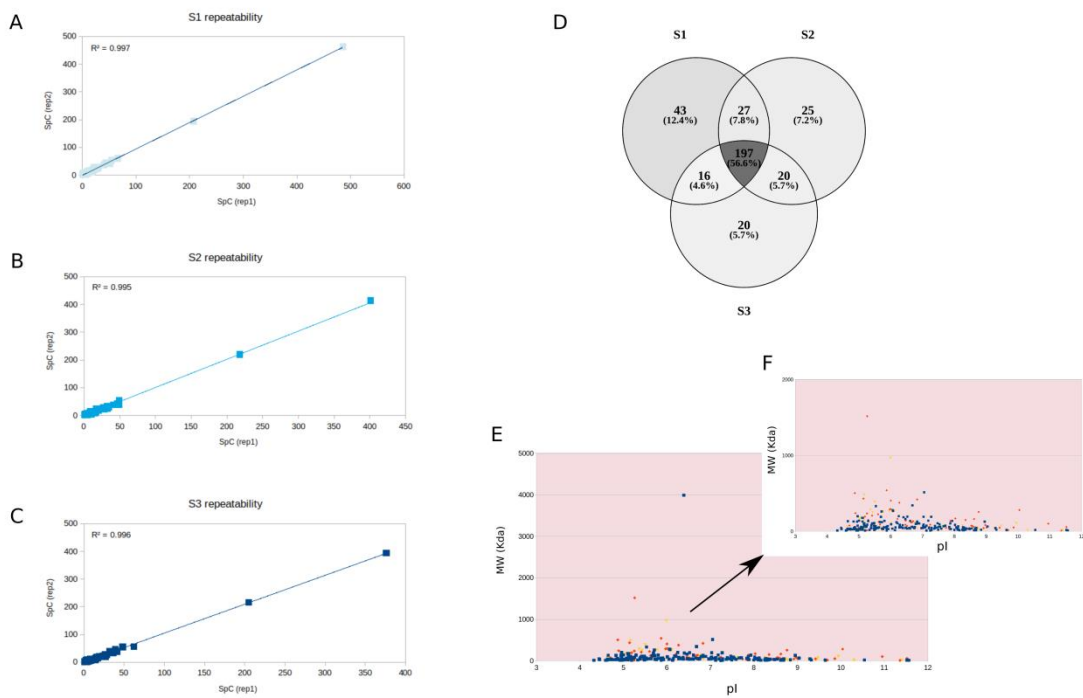

16

17

18

19

20

21

22

23

Figure S2. Protein profile of the lyo-secretome obtained by adipose-derived mesenchymal stem cells. Repeatability of S1 (A), S2 (B) and S3 (C) technical replicate analyses; in all cases  $R^2 > 0.99$ . D) Venn diagram of proteins identified in S1, S2 and S3 biological replicates. E, F) Virtual 2D map obtained plotting MW and pI of the proteins identified; blue dots: proteins identified with an average  $SpC < 1$ , red dots: proteins identified with an average  $2 < SpC < 10$ , yellow dots: proteins identified with an average  $SpC > 10$ .

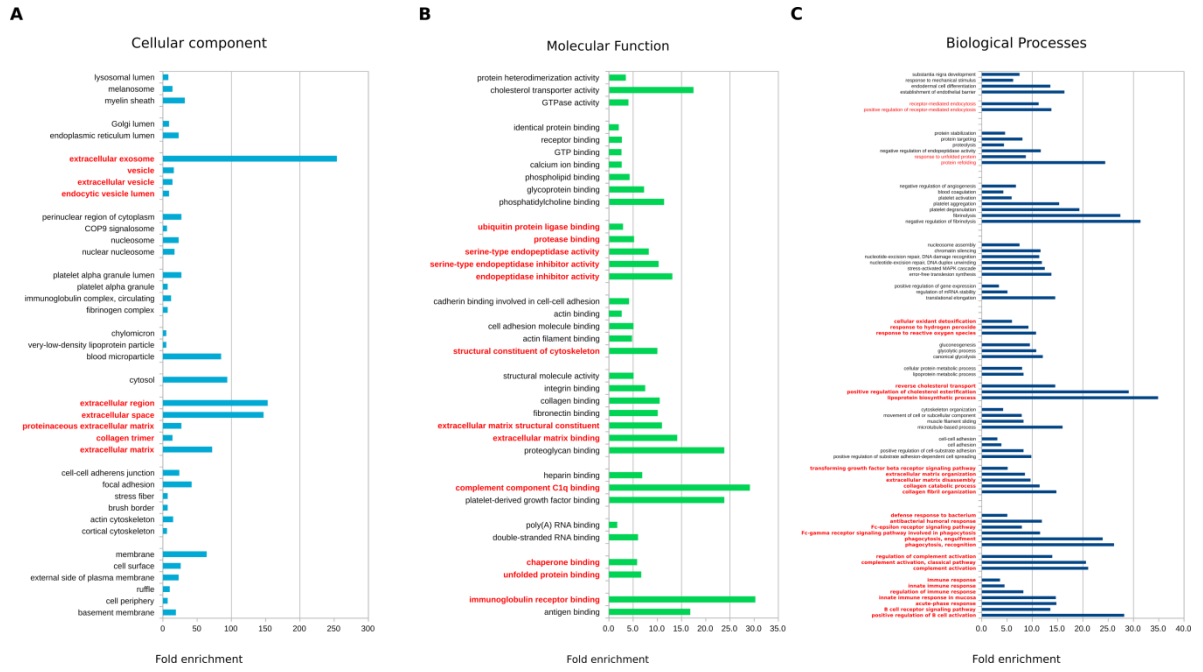

24  
25  
26  
27  
28  
29

Figure S3: A) Cellular components, B) molecular functions and C) biological processes enriched in the proteome characterized by analyzing the lyo-secretome obtained by adipose-derived mesenchymal stem cells. Fold enrichment was calculated by means of DAVID db as reported in M&M section. In red are marked the most enriched categories.

30

31

**Table S1.** Model calibration curves for BCA-protein assay.

| Date | Slope  | Intercept | R <sup>2</sup> | Range (µg/ml) | LOD (µg/ml) | LOQ (µg/ml) | Accuracy |     |
|------|--------|-----------|----------------|---------------|-------------|-------------|----------|-----|
|      |        |           |                |               |             |             | Min      | Max |
| 17.5 | 0,0171 | 0,65      | 0,975          | 20-100        | 20          | 60          | 93       | 112 |
| 18.5 | 0,0170 | 0,13      | 0,998          | 2.5-30        | 1,4         | 4           | 97       | 108 |
| 19.5 | 0,0248 | 0,57      | 0,998          | 20-50         | 2,3         | 7           | 96       | 102 |
| 23.5 | 0,0129 | 0,16      | 0,974          | 2.5-50        | 6           | 18          | 89       | 105 |
| 24.5 | 0,0109 | 0,24      | 0,951          | 10-50         | 14          | 44          | 92       | 113 |
| 24.5 | 0,0135 | 0,26      | 0,954          | 10-50         | 14          | 42          | 92       | 113 |
| 1.6  | 0,0098 | 0,18      | 0,993          | 10-50         | 5           | 16          | 98       | 104 |
| 15.6 | 0,0159 | 0,15      | 0,998          | 2.5-50        | 1,6         | 5           | 96       | 102 |
| 28.6 | 0,0123 | 0,41      | 0,993          | 5-50          | 4           | 13          | 95       | 103 |

Table S2. Intermediate precision for BCA-protein assay at high, intermediate and low level.

|                                      | High level   |               | Intermediate level                  |                 |                              |               | Low level    |       |
|--------------------------------------|--------------|---------------|-------------------------------------|-----------------|------------------------------|---------------|--------------|-------|
| 50 µg/ml                             | Day 1        | Day 2         | 30<br>µg/ml                         | Day 1           | Day 2                        | 10<br>µg/ml   | Day 1        | Day 2 |
|                                      | 0,669        | 0,653         |                                     | 0,481           | 0,426                        |               | 0,260        | 0,205 |
|                                      | 0,683        | 0,650         |                                     | 0,467           | 0,437                        |               | 0,271        | 0,202 |
|                                      | 0,669        | 0,674         |                                     | 0,493           | 0,456                        |               | 0,277        | 0,204 |
| <b>Variance analysis: one factor</b> |              |               | <b>High level: 50 µg/ml</b>         |                 |                              |               |              |       |
| <i>Summary</i>                       |              |               |                                     |                 |                              |               |              |       |
| <i>Groups</i>                        | <i>Count</i> | <i>Sum</i>    | <i>Mean</i>                         | <i>Variance</i> |                              | Ok at 95%     |              |       |
| Day 1                                | 3            | 2,021         | 0,673667                            | 6,53E-05        |                              |               |              |       |
| Day 2                                | 3            | 1,977         | 0,659                               | 0,000171        |                              |               |              |       |
| <i>Origin of the variation</i>       | <i>SQ</i>    | <i>gdl</i>    | <i>MQ</i>                           | <i>F</i>        | <i>Value of significance</i> | <i>F crit</i> | <i>Prob.</i> |       |
| Between groups                       | 0,000323     | 1             | 0,000323                            | 2,730606        | 0,173786                     | 7,708647      | 95%          |       |
| In groups                            | 0,000473     | 4             | 0,000118                            |                 |                              |               |              |       |
| Total                                | 0,000795     | 5             |                                     |                 |                              |               |              |       |
| <b>Variance analysis: one factor</b> |              |               | <b>Intermediate level: 30 µg/ml</b> |                 |                              |               |              |       |
| <i>Summary</i>                       |              |               |                                     |                 |                              |               |              |       |
| <i>Groups</i>                        | <i>Count</i> | <i>Groups</i> | <i>Count</i>                        | Ok at 99%       |                              |               |              |       |
| Day 1                                | 3            | 1,441         | 0,480333                            |                 |                              |               |              |       |
| Day 2                                | 3            | 1,319         | 0,439667                            |                 |                              |               |              |       |
| <i>Origin of the variation</i>       | <i>SQ</i>    | <i>gdl</i>    | <i>MQ</i>                           | <i>F</i>        | <i>Value of significance</i> | <i>F crit</i> | <i>Prob.</i> |       |
| Between groups                       | 0,002481     | 1             | 0,002481                            | 12,41368        | 0,024377                     | 7,708647      | 95%          |       |
| In groups                            | 0,000799     | 4             | 0,0002                              |                 |                              | 21,19769      | 99%          |       |
| Total                                | 0,00328      | 5             |                                     |                 |                              |               |              |       |
| <b>Variance analysis: one factor</b> |              |               | <b>Low level: 10 µg/ml</b>          |                 |                              |               |              |       |
| <i>Summary</i>                       |              |               |                                     |                 |                              |               |              |       |
| <i>Groups</i>                        | <i>Count</i> | <i>Sum</i>    | <i>Mean</i>                         | <i>Variance</i> | No                           |               |              |       |
| Day 1                                | 3            | 0,808         | 0,269333                            | 7,43E-05        |                              |               |              |       |
| Day 2                                | 3            | 0,611         | 0,203667                            | 2,33E-06        |                              |               |              |       |
| <i>Origin of the variation</i>       | <i>SQ</i>    | <i>gdl</i>    | <i>MQ</i>                           | <i>F</i>        | <i>Value of significance</i> | <i>F crit</i> | <i>Prob.</i> |       |
| Between groups                       | 0,006468     | 1             | 0,006468                            | 168,7348        | 0,000203                     | 21,19769      | 99%          |       |
| In groups                            | 0,000153     | 4             | 3,83E-05                            |                 |                              | 74,13729      | 99,9%        |       |
| Total                                | 0,006622     | 5             |                                     |                 |                              |               |              |       |

34

**Table S3.** Linearity model calibration curves for Nile Red assay.

| <b>Phosphatidylcholine<br/>concentration (µg/ml)</b> | <b>Fluorescence reading</b> |
|------------------------------------------------------|-----------------------------|
| 20                                                   | 78832                       |
| 15                                                   | 59336                       |
| 10                                                   | 41027                       |
| 8                                                    | 35988                       |
| 2.5                                                  | 12250                       |

35

**Table S4.** Accuracy data for Nile Red assay.

| Concentration level ( $\mu\text{g/ml}$ ) | Concentration measured ( $\mu\text{g/ml}$ ) | Recovery |
|------------------------------------------|---------------------------------------------|----------|
| 1.00                                     | 0.97                                        | 96.7     |
|                                          | 0.98                                        | 97.8     |
|                                          | 0.98                                        | 98.4     |
| 10.00                                    | 9.85                                        | 98.5     |
|                                          | 9.98                                        | 99.8     |
|                                          | 10.1                                        | 101.1    |
| 20.00                                    | 20.1                                        | 100.5    |
|                                          | 19.9                                        | 99.5     |
|                                          | 20.6                                        | 102.8    |

Table S5. Precision data for Nile Red assay.

|                                        | Concentration found ( $\mu\text{g/ml}$ ) |       |
|----------------------------------------|------------------------------------------|-------|
|                                        | 0.97                                     | 96.7  |
|                                        | 0.98                                     | 97.8  |
|                                        | 0.98                                     | 98.4  |
|                                        | 9.85                                     | 98.5  |
|                                        | 9.98                                     | 99.8  |
|                                        | 10.1                                     | 101.1 |
|                                        | 20.1                                     | 100.5 |
| <i>Mean</i>                            | 10.2                                     | 10.0  |
| <i>s</i>                               | 0.4                                      | 0.3   |
| <i>Confidence interval (95%, n=6)</i>  | 0.46                                     | 0.36  |
| <i>RSD %</i>                           | 4.28                                     | 3.45  |
| <i>Total mean</i>                      | 10.1                                     |       |
| <i>Pooled s</i>                        | 0.4                                      |       |
| <i>Confidence interval (95%, n=12)</i> | 0.27                                     |       |
| <i>RSD %</i>                           | 4.15                                     |       |
| <i>Fcalc(0.05;5;5)</i>                 | 1.592                                    |       |
| <i>F(0.05; 5;5)</i>                    | 5.050                                    |       |
| <i>tcalc(0.05; 10)</i>                 | 0.820                                    |       |
| <i>tcrit(0.05; 10)</i>                 | 2.228                                    |       |



41  
42  
43  
44  
45  
46  
47  
48  
49  
50  
51  
52  
53  
54  
55  
56  
57  
58  
59  
60  
61  
62  
63  
64  
65  
66  
67  
68  
69  
70  
71  
72  
73  
74  
75  
76  
77  
78  
79

**80 Table legend**

81 **Table S6.** List of proteins identified by analyzing the lyo-secretome obtained by adipose-derived mesenchymal  
82 stem cells. S1, S2, S3: biological replicate samples. SpC: spectral count. MW: molecular weight, Frequency of  
83 identification (%). n=6.

Table S6

| Annotations |                                                                                          | Spectral count (SpC) |      |      |      |      |      | Normalized SpC |                                 |             |         |                  |
|-------------|------------------------------------------------------------------------------------------|----------------------|------|------|------|------|------|----------------|---------------------------------|-------------|---------|------------------|
| Accession   | Description                                                                              | Gene Name            | S1   |      | S2   |      | S3   |                | Frequency of Identification (%) | Average SpC | MW      | (Av.SpC/MW)*1000 |
|             |                                                                                          |                      | S1_1 | S1_2 | S2_1 | S2_2 | S3_1 | S3_2           |                                 |             |         |                  |
| P02768      | Serum albumin OS=Homo sapiens GN=ALB PE=1 SV=2                                           | ALB                  | 486  | 462  | 401  | 414  | 376  | 394            | 100,0                           | 422,17      | 69,367  | 6,09E+00         |
| P02751      | Fibronectin OS=Homo sapiens GN=FN1 PE=1 SV=4                                             | FN1                  | 207  | 194  | 218  | 220  | 205  | 216            | 100,0                           | 210,00      | 262,625 | 8,00E-01         |
| P01024      | Complement C3 OS=Homo sapiens GN=C3 PE=1 SV=2                                            | C3                   | 66   | 61   | 49   | 53   | 62   | 56             | 100,0                           | 57,83       | 187,148 | 3,09E-01         |
| P01023      | Alpha-2-macroglobulin OS=Homo sapiens GN=A2M PE=1 SV=3                                   | A2M                  | 51   | 41   | 47   | 42   | 48   | 55             | 100,0                           | 47,33       | 163,291 | 2,90E-01         |
| P02787      | Serotransferrin OS=Homo sapiens GN=TF PE=1 SV=3                                          | TF                   | 54   | 54   | 42   | 38   | 41   | 39             | 100,0                           | 44,67       | 77,064  | 5,80E-01         |
| P12109      | Collagen alpha-1(VI) chain OS=Homo sapiens GN=COL6A1 PE=1 SV=3                           | COL6A1               | 41   | 39   | 41   | 38   | 36   | 34             | 100,0                           | 38,17       | 108,529 | 3,52E-01         |
| P01009      | Alpha-1-antitrypsin OS=Homo sapiens GN=SERPINA1 PE=1 SV=3                                | SERPINA1             | 40   | 37   | 32   | 34   | 39   | 46             | 100,0                           | 38,00       | 46,737  | 8,13E-01         |
| P02647      | Apolipoprotein A-I OS=Homo sapiens GN=APOA1 PE=1 SV=1                                    | APOA1                | 43   | 44   | 35   | 29   | 28   | 27             | 100,0                           | 34,33       | 30,778  | 1,12E+00         |
| P08123      | Collagen alpha-2(I) chain OS=Homo sapiens GN=COL1A2 PE=1 SV=7                            | COL1A2               | 28   | 23   | 32   | 29   | 32   | 40             | 100,0                           | 30,67       | 129,314 | 2,37E-01         |
| P04114      | Apolipoprotein B-100 OS=Homo sapiens GN=APOB PE=1 SV=2                                   | APOB                 | 20   | 21   | 49   | 40   | 26   | 28             | 100,0                           | 30,67       | 515,605 | 5,95E-02         |
| P60709      | Actin, cytoplasmic 1 OS=Homo sapiens GN=ACTB PE=1 SV=1                                   | ACTB                 | 22   | 28   | 33   | 25   | 28   | 27             | 100,0                           | 27,17       | 41,737  | 6,51E-01         |
| P63261      | Actin, cytoplasmic 2 OS=Homo sapiens GN=ACTG1 PE=1 SV=1                                  | ACTG1                | 22   | 28   | 33   | 25   | 28   | 27             | 100,0                           | 27,17       | 41,793  | 6,50E-01         |
| P01857      | Ig gamma-1 chain C region OS=Homo sapiens GN=IGHG1 PE=1 SV=1                             | IGHG1                | 22   | 26   | 27   | 28   | 28   | 27             | 100,0                           | 26,33       | 36,106  | 7,29E-01         |
| P08670      | Vimentin OS=Homo sapiens GN=VIM PE=1 SV=4                                                | VIM                  | 30   | 28   | 28   | 24   | 24   | 24             | 100,0                           | 26,33       | 53,652  | 4,91E-01         |
| P02675      | Fibrinogen beta chain OS=Homo sapiens GN=FGB PE=1 SV=2                                   | FGB                  | 28   | 28   | 23   | 24   | 26   | 27             | 100,0                           | 26,00       | 55,928  | 4,65E-01         |
| P08253      | 72 kDa type IV collagenase OS=Homo sapiens GN=MMP2 PE=1 SV=2                             | MMP2                 | 25   | 24   | 26   | 24   | 26   | 27             | 100,0                           | 25,33       | 73,882  | 3,43E-01         |
| P12111      | Collagen alpha-3(VI) chain OS=Homo sapiens GN=COL6A3 PE=1 SV=5                           | COL6A3               | 23   | 25   | 31   | 25   | 27   | 21             | 100,0                           | 25,33       | 343,669 | 7,37E-02         |
| C9JC84      | Fibrinogen gamma chain OS=Homo sapiens GN=FGG PE=1 SV=1                                  | FGG                  | 24   | 28   | 21   | 22   | 19   | 22             | 100,0                           | 22,67       | 52,338  | 4,33E-01         |
| P36955      | Pigment epithelium-derived factor OS=Homo sapiens GN=SERPINF1 PE=1 SV=4                  | SERPINF1             | 24   | 24   | 24   | 22   | 20   | 21             | 100,0                           | 22,50       | 46,312  | 4,86E-01         |
| P01834      | Ig kappa chain C region OS=Homo sapiens GN=IGKC PE=1 SV=1                                | IGKC                 | 23   | 20   | 20   | 18   | 20   | 19             | 100,0                           | 20,00       | 11,765  | 1,70E+00         |
| P02671      | Fibrinogen alpha chain OS=Homo sapiens GN=FGA PE=1 SV=2                                  | FGA                  | 20   | 19   | 17   | 23   | 16   | 20             | 100,0                           | 19,17       | 94,973  | 2,02E-01         |
| P02452      | Collagen alpha-1(I) chain OS=Homo sapiens GN=COL1A1 PE=1 SV=5                            | COL1A1               | 19   | 14   | 16   | 15   | 17   | 16             | 100,0                           | 16,17       | 138,941 | 1,16E-01         |
| P01871      | Ig mu chain C region OS=Homo sapiens GN=IGHM PE=1 SV=3                                   | IGHM                 | 15   | 17   | 15   | 15   | 15   | 14             | 100,0                           | 15,17       | 49,440  | 3,07E-01         |
| P68032      | Actin, alpha cardiac muscle 1 OS=Homo sapiens GN=ACTC1 PE=1 SV=1                         | ACTC1                | 12   | 15   | 17   | 14   | 15   | 16             | 100,0                           | 14,83       | 42,019  | 3,53E-01         |
| P68133      | Actin, alpha skeletal muscle OS=Homo sapiens GN=ACTA1 PE=1 SV=1                          | ACTA1                | 12   | 15   | 17   | 14   | 15   | 16             | 100,0                           | 14,83       | 42,051  | 3,53E-01         |
| P51884      | Lumican OS=Homo sapiens GN=LUM PE=1 SV=2                                                 | LUM                  | 13   | 16   | 16   | 12   | 16   | 15             | 100,0                           | 14,67       | 38,429  | 3,82E-01         |
| D6RF35      | Vitamin D-binding protein OS=Homo sapiens GN=GC PE=1 SV=1                                | GC                   | 14   | 11   | 17   | 15   | 13   | 13             | 100,0                           | 13,83       | 53,021  | 2,61E-01         |
| Q15582      | Transforming growth factor-beta-induced protein ig-h3 OS=Homo sapiens GN=TGFB1 PE=1 SV=1 | TGFB1                | 18   | 15   | 9    | 12   | 15   | 12             | 100,0                           | 13,50       | 74,681  | 1,81E-01         |
| P0C0L5      | Complement C4-B OS=Homo sapiens GN=C4B PE=1 SV=2                                         | C4B                  | 14   | 18   | 9    | 14   | 14   | 9              | 100,0                           | 13,00       | 192,751 | 6,74E-02         |
| P05155      | Plasma protease C1 inhibitor OS=Homo sapiens GN=SERPING1 PE=1 SV=2                       | SERPING1             | 10   | 15   | 12   | 16   | 13   | 11             | 100,0                           | 12,83       | 55,154  | 2,33E-01         |
| P00738      | Haptoglobin OS=Homo sapiens GN=HP PE=1 SV=1                                              | HP                   | 13   | 11   | 14   | 9    | 14   | 15             | 100,0                           | 12,67       | 45,205  | 2,80E-01         |
| P23142      | Fibulin-1 OS=Homo sapiens GN=FBLN1 PE=1 SV=4                                             | FBLN1                | 16   | 13   | 16   | 10   | 10   | 10             | 100,0                           | 12,50       | 77,214  | 1,62E-01         |
| P07585      | Decorin OS=Homo sapiens GN=DCN PE=1 SV=1                                                 | DCN                  | 11   | 10   | 11   | 12   | 14   | 13             | 100,0                           | 11,83       | 39,747  | 2,98E-01         |
| P19823      | Inter-alpha-trypsin inhibitor heavy chain H2 OS=Homo sapiens GN=ITIH2 PE=1 SV=2          | ITIH2                | 18   | 12   | 8    | 10   | 12   | 10             | 100,0                           | 11,67       | 106,463 | 1,10E-01         |
| Q9Y490      | Talin-1 OS=Homo sapiens GN=TLN1 PE=1 SV=3                                                | TLN1                 | 10   | 10   | 13   | 13   | 13   | 10             | 100,0                           | 11,50       | 269,767 | 4,26E-02         |
| P09871      | Complement C1s subcomponent OS=Homo sapiens GN=C1S PE=1 SV=1                             | C1S                  | 11   | 10   | 10   | 12   | 13   | 12             | 100,0                           | 11,33       | 76,684  | 1,48E-01         |
| P63104      | 14-3-3 protein zeta/delta OS=Homo sapiens GN=YWHAZ PE=1 SV=1                             | YWHAZ                | 11   | 13   | 10   | 11   | 10   | 9              | 100,0                           | 10,67       | 27,745  | 3,84E-01         |
| A0A0G2JPRO  | Complement C4-A OS=Homo sapiens GN=C4A PE=1 SV=1                                         | C4A                  | 0    | 18   | 9    | 14   | 14   | 9              | 83,3                            | 10,67       | 192,876 | 5,53E-02         |
| P00450      | Ceruloplasmin OS=Homo sapiens GN=CP PE=1 SV=1                                            | CP                   | 11   | 8    | 11   | 12   | 8    | 12             | 100,0                           | 10,33       | 122,205 | 8,46E-02         |
| P02763      | Alpha-1-acid glycoprotein 1 OS=Homo sapiens GN=ORM1 PE=1 SV=1                            | ORM1                 | 9    | 10   | 9    | 8    | 12   | 11             | 100,0                           | 9,83        | 23,512  | 4,18E-01         |
| P06733      | Alpha-enolase OS=Homo sapiens GN=ENO1 PE=1 SV=2                                          | ENO1                 | 8    | 11   | 10   | 11   | 10   | 9              | 100,0                           | 9,83        | 47,169  | 2,08E-01         |
| A0M8Q6      | Ig lambda-7 chain C region OS=Homo sapiens GN=IGLC7 PE=4 SV=2                            | IGLC7                | 11   | 10   | 11   | 10   | 8    | 8              | 100,0                           | 9,67        | 11,254  | 8,59E-01         |
| P0CG06      | Ig lambda-3 chain C regions OS=Homo sapiens GN=IGLC3 PE=1 SV=1                           | IGLC3                | 11   | 10   | 11   | 10   | 8    | 8              | 100,0                           | 9,67        | 11,266  | 8,58E-01         |
| P0CF74      | Ig lambda-6 chain C region OS=Homo sapiens GN=IGLC6 PE=4 SV=1                            | IGLC6                | 11   | 10   | 11   | 10   | 8    | 8              | 100,0                           | 9,67        | 11,277  | 8,57E-01         |
| P0CG05      | Ig lambda-2 chain C regions OS=Homo sapiens GN=IGLC2 PE=1 SV=1                           | IGLC2                | 11   | 10   | 11   | 10   | 8    | 8              | 100,0                           | 9,67        | 11,294  | 8,56E-01         |
| P04264      | Keratin, type II cytoskeletal 1 OS=Homo sapiens GN=KRT1 PE=1 SV=6                        | KRT1                 | 11   | 13   | 10   | 4    | 8    | 10             | 100,0                           | 9,33        | 66,039  | 1,41E-01         |
| B4DPQ0      | Complement C1r subcomponent OS=Homo sapiens GN=C1R PE=1 SV=1                             | C1R                  | 9    | 7    | 10   | 9    | 10   | 11             | 100,0                           | 9,33        | 81,890  | 1,14E-01         |
| P01861      | Ig gamma-4 chain C region OS=Homo sapiens GN=IGHG4 PE=1 SV=1                             | IGHG4                | 10   | 9    | 12   | 0    | 12   | 12             | 83,3                            | 9,17        | 35,941  | 2,55E-01         |
| P12814      | Alpha-actinin-1 OS=Homo sapiens GN=ACTN1 PE=1 SV=2                                       | ACTN1                | 5    | 10   | 10   | 9    | 11   | 10             | 100,0                           | 9,17        | 103,058 | 8,89E-02         |
| P39059      | Collagen alpha-1(XV) chain OS=Homo sapiens GN=COL15A1 PE=1 SV=2                          | COL15A1              | 4    | 9    | 13   | 10   | 6    | 9              | 100,0                           | 8,50        | 141,720 | 6,00E-02         |
| P01876      | Ig alpha-1 chain C region OS=Homo sapiens GN=IGHA1 PE=1 SV=2                             | IGHA1                | 7    | 10   | 10   | 6    | 8    | 8              | 100,0                           | 8,17        | 37,655  | 2,17E-01         |

Table S6

|            |                                                                                      |          |    |   |   |   |   |    |       |      |         |          |
|------------|--------------------------------------------------------------------------------------|----------|----|---|---|---|---|----|-------|------|---------|----------|
| P60174     | Triosephosphate isomerase OS=Homo sapiens GN=TPH1 PE=1 SV=3                          | TPH1     | 7  | 9 | 6 | 9 | 9 | 8  | 100,0 | 8,00 | 30,791  | 2,60E-01 |
| Q16363     | Laminin subunit alpha-4 OS=Homo sapiens GN=LAMA4 PE=1 SV=4                           | LAMA4    | 11 | 9 | 9 | 8 | 3 | 7  | 100,0 | 7,83 | 202,524 | 3,87E-02 |
| P26022     | Pentraxin-related protein PTX3 OS=Homo sapiens GN=PTX3 PE=1 SV=3                     | PTX3     | 11 | 7 | 5 | 9 | 4 | 10 | 100,0 | 7,67 | 41,976  | 1,83E-01 |
| P02790     | Hemopexin OS=Homo sapiens GN=HPX PE=1 SV=2                                           | HPX      | 8  | 7 | 7 | 9 | 5 | 9  | 100,0 | 7,50 | 51,676  | 1,45E-01 |
| P01859     | Ig gamma-2 chain C region OS=Homo sapiens GN=IGHG2 PE=1 SV=2                         | IGHG2    | 7  | 8 | 4 | 8 | 7 | 10 | 100,0 | 7,33 | 35,901  | 2,04E-01 |
| P00338     | L-lactate dehydrogenase A chain OS=Homo sapiens GN=LDHA PE=1 SV=2                    | LDHA     | 10 | 8 | 7 | 7 | 6 | 6  | 100,0 | 7,33 | 36,689  | 2,00E-01 |
| P04217     | Alpha-1B-glycoprotein OS=Homo sapiens GN=A1BG PE=1 SV=4                              | A1BG     | 9  | 9 | 5 | 9 | 6 | 6  | 100,0 | 7,33 | 54,254  | 1,35E-01 |
| P21333     | Filamin-A OS=Homo sapiens GN=FLNA PE=1 SV=4                                          | FLNA     | 9  | 6 | 9 | 4 | 8 | 7  | 100,0 | 7,17 | 280,739 | 2,55E-02 |
| G3XAI2     | Laminin subunit beta-1 OS=Homo sapiens GN=LAMB1 PE=1 SV=1                            | LAMB1    | 8  | 7 | 8 | 6 | 7 | 5  | 100,0 | 6,83 | 200,478 | 3,41E-02 |
| V9GYM3     | Apolipoprotein A-II OS=Homo sapiens GN=APOA2 PE=1 SV=1                               | APOA2    | 6  | 8 | 5 | 8 | 7 | 6  | 100,0 | 6,67 | 14,914  | 4,47E-01 |
| P67936     | Tropomyosin alpha-4 chain OS=Homo sapiens GN=TPM4 PE=1 SV=3                          | TPM4     | 7  | 9 | 5 | 6 | 5 | 6  | 100,0 | 6,33 | 28,522  | 2,22E-01 |
| Q12841     | Follistatin-related protein 1 OS=Homo sapiens GN=FSTL1 PE=1 SV=1                     | FSTL1    | 5  | 6 | 7 | 7 | 7 | 6  | 100,0 | 6,33 | 34,986  | 1,81E-01 |
| P10809     | 60 kDa heat shock protein, mitochondrial OS=Homo sapiens GN=HSPD1 PE=1 SV=2          | HSPD1    | 6  | 3 | 8 | 6 | 5 | 8  | 100,0 | 6,00 | 61,055  | 9,83E-02 |
| P05121     | Plasminogen activator inhibitor 1 OS=Homo sapiens GN=SERPINE1 PE=1 SV=1              | SERPINE1 | 7  | 8 | 8 | 4 | 5 | 3  | 100,0 | 5,83 | 45,060  | 1,29E-01 |
| P18206     | Vinculin OS=Homo sapiens GN=VCL PE=1 SV=4                                            | VCL      | 8  | 6 | 6 | 6 | 6 | 3  | 100,0 | 5,83 | 123,799 | 4,71E-02 |
| P68871     | Hemoglobin subunit beta OS=Homo sapiens GN=HBB PE=1 SV=2                             | HBB      | 6  | 4 | 6 | 7 | 5 | 6  | 100,0 | 5,67 | 15,998  | 3,54E-01 |
| P62258     | 14-3-3 protein epsilon OS=Homo sapiens GN=YWHAE PE=1 SV=1                            | YWHAE    | 7  | 7 | 6 | 5 | 5 | 4  | 100,0 | 5,67 | 29,174  | 1,94E-01 |
| P07996     | Thrombospondin-1 OS=Homo sapiens GN=THBS1 PE=1 SV=2                                  | THBS1    | 2  | 7 | 3 | 5 | 7 | 9  | 100,0 | 5,50 | 129,383 | 4,25E-02 |
| C9JV77     | Alpha-2-HS-glycoprotein OS=Homo sapiens GN=AHSG PE=1 SV=1                            | AHSG     | 4  | 4 | 5 | 6 | 6 | 6  | 100,0 | 5,17 | 39,412  | 1,31E-01 |
| P07237     | Protein disulfide-isomerase OS=Homo sapiens GN=P4HB PE=1 SV=3                        | P4HB     | 4  | 6 | 7 | 6 | 4 | 4  | 100,0 | 5,17 | 57,116  | 9,05E-02 |
| K7E570     | Microfibril-associated glycoprotein 4 OS=Homo sapiens GN=MFAP4 PE=1 SV=1             | MFAP4    | 6  | 6 | 4 | 5 | 4 | 5  | 100,0 | 5,00 | 31,326  | 1,60E-01 |
| P13645     | Keratin, type I cytoskeletal 10 OS=Homo sapiens GN=KRT10 PE=1 SV=6                   | KRT10    | 7  | 8 | 0 | 0 | 7 | 7  | 66,7  | 4,83 | 58,827  | 8,22E-02 |
| P69905     | Hemoglobin subunit alpha OS=Homo sapiens GN=HBA1 PE=1 SV=2                           | HBA1     | 6  | 4 | 4 | 7 | 4 | 3  | 100,0 | 4,67 | 15,258  | 3,06E-01 |
| P04179     | Superoxide dismutase [Mn], mitochondrial OS=Homo sapiens GN=SOD2 PE=1 SV=2           | SOD2     | 5  | 4 | 4 | 4 | 5 | 6  | 100,0 | 4,67 | 24,722  | 1,89E-01 |
| P09486     | SPARC OS=Homo sapiens GN=SPARC PE=1 SV=1                                             | SPARC    | 3  | 3 | 5 | 5 | 6 | 6  | 100,0 | 4,67 | 34,632  | 1,35E-01 |
| P04406     | Glyceraldehyde-3-phosphate dehydrogenase OS=Homo sapiens GN=GAPDH PE=1 SV=           | GAPDH    | 6  | 5 | 4 | 5 | 3 | 5  | 100,0 | 4,67 | 36,053  | 1,29E-01 |
| P01019     | Angiotensinogen OS=Homo sapiens GN=AGT PE=1 SV=1                                     | AGT      | 7  | 5 | 5 | 3 | 4 | 4  | 100,0 | 4,67 | 53,154  | 8,78E-02 |
| O43707     | Alpha-actinin-4 OS=Homo sapiens GN=ACTN4 PE=1 SV=2                                   | ACTN4    | 5  | 9 | 0 | 7 | 0 | 7  | 66,7  | 4,67 | 104,854 | 4,45E-02 |
| P04004     | Vitronectin OS=Homo sapiens GN=VTN PE=1 SV=1                                         | VTN      | 4  | 5 | 4 | 5 | 4 | 4  | 100,0 | 4,33 | 54,306  | 7,98E-02 |
| P80723     | Brain acid soluble protein 1 OS=Homo sapiens GN=BASP1 PE=1 SV=2                      | BASP1    | 8  | 7 | 2 | 4 | 2 | 2  | 100,0 | 4,17 | 22,693  | 1,84E-01 |
| P14618     | Pyruvate kinase PKM OS=Homo sapiens GN=PKM PE=1 SV=4                                 | PKM      | 5  | 3 | 3 | 4 | 6 | 4  | 100,0 | 4,17 | 57,937  | 7,19E-02 |
| P02461     | Collagen alpha-1(III) chain OS=Homo sapiens GN=COL3A1 PE=1 SV=4                      | COL3A1   | 6  | 3 | 5 | 3 | 5 | 5  | 100,0 | 4,17 | 138,564 | 3,01E-02 |
| P10909     | Clusterin OS=Homo sapiens GN=CLU PE=1 SV=1                                           | CLU      | 4  | 3 | 5 | 3 | 5 | 4  | 100,0 | 4,00 | 52,495  | 7,62E-02 |
| P19827     | Inter-alpha-trypsin inhibitor heavy chain H1 OS=Homo sapiens GN=ITIH1 PE=1 SV=3      | ITIH1    | 6  | 7 | 0 | 1 | 4 | 5  | 83,3  | 3,83 | 101,389 | 3,78E-02 |
| P08567     | Pleckstrin OS=Homo sapiens GN=PLEK PE=1 SV=3                                         | PLEK     | 3  | 5 | 3 | 4 | 4 | 3  | 100,0 | 3,67 | 40,125  | 9,14E-02 |
| P35527     | Keratin, type I cytoskeletal 9 OS=Homo sapiens GN=KRT9 PE=1 SV=3                     | KRT9     | 6  | 5 | 1 | 1 | 5 | 4  | 100,0 | 3,67 | 62,064  | 5,91E-02 |
| P19652     | Alpha-1-acid glycoprotein 2 OS=Homo sapiens GN=ORM2 PE=1 SV=2                        | ORM2     | 7  | 5 | 4 | 0 | 0 | 5  | 66,7  | 3,50 | 23,603  | 1,48E-01 |
| P29401     | Transketolase OS=Homo sapiens GN=TKT PE=1 SV=3                                       | TKT      | 5  | 4 | 3 | 4 | 2 | 3  | 100,0 | 3,50 | 67,878  | 5,16E-02 |
| Q8IUX7     | Adipocyte enhancer-binding protein 1 OS=Homo sapiens GN=AEBP1 PE=1 SV=1              | AEBP1    | 4  | 3 | 4 | 2 | 4 | 4  | 100,0 | 3,50 | 130,929 | 2,67E-02 |
| P00325     | Alcohol dehydrogenase 1B OS=Homo sapiens GN=ADH1B PE=1 SV=2                          | ADH1B    | 3  | 3 | 4 | 2 | 3 | 5  | 100,0 | 3,33 | 39,855  | 8,36E-02 |
| P12110     | Collagen alpha-2(VI) chain OS=Homo sapiens GN=COL6A2 PE=1 SV=4                       | COL6A2   | 2  | 2 | 4 | 3 | 6 | 3  | 100,0 | 3,33 | 108,579 | 3,07E-02 |
| P11047     | Laminin subunit gamma-1 OS=Homo sapiens GN=LAMC1 PE=1 SV=3                           | LAMC1    | 5  | 4 | 3 | 2 | 3 | 3  | 100,0 | 3,33 | 177,603 | 1,88E-02 |
| Q12805     | EGF-containing fibulin-like extracellular matrix protein 1 OS=Homo sapiens GN=EFEMP1 | EFEMP1   | 4  | 4 | 4 | 3 | 2 | 2  | 100,0 | 3,17 | 54,641  | 5,80E-02 |
| Q15063     | Periostin OS=Homo sapiens GN=POSTN PE=1 SV=2                                         | POSTN    | 4  | 4 | 3 | 4 | 1 | 3  | 100,0 | 3,17 | 93,314  | 3,39E-02 |
| P01619     | Immunoglobulin kappa variable 3-20 OS=Homo sapiens GN=IGKV3-20 PE=1 SV=2             | IGKV3-20 | 2  | 4 | 3 | 1 | 4 | 4  | 100,0 | 3,00 | 12,557  | 2,39E-01 |
| P01011     | Alpha-1-antitrypsin OS=Homo sapiens GN=SERPINA3 PE=1 SV=2                            | SERPINA3 | 5  | 1 | 1 | 2 | 2 | 7  | 100,0 | 3,00 | 47,651  | 6,30E-02 |
| P62987     | Ubiquitin-60S ribosomal protein L40 OS=Homo sapiens GN=UBA52 PE=1 SV=2               | UBA52    | 3  | 2 | 2 | 3 | 4 | 3  | 100,0 | 2,83 | 14,728  | 1,92E-01 |
| P62979     | Ubiquitin-40S ribosomal protein S27a OS=Homo sapiens GN=RPS27A PE=1 SV=2             | RPS27A   | 3  | 2 | 2 | 3 | 4 | 3  | 100,0 | 2,83 | 17,965  | 1,58E-01 |
| P0CG47     | Polyubiquitin-B OS=Homo sapiens GN=UBB PE=1 SV=1                                     | UBB      | 3  | 2 | 2 | 3 | 4 | 3  | 100,0 | 2,83 | 25,762  | 1,10E-01 |
| P0CG48     | Polyubiquitin-C OS=Homo sapiens GN=UBC PE=1 SV=3                                     | UBC      | 3  | 2 | 2 | 3 | 4 | 3  | 100,0 | 2,83 | 77,039  | 3,68E-02 |
| AOA087WT59 | Transthyretin OS=Homo sapiens GN=TTR PE=1 SV=1                                       | TTR      | 4  | 1 | 2 | 2 | 3 | 3  | 100,0 | 2,50 | 20,146  | 1,24E-01 |
| P68363     | Tubulin alpha-1B chain OS=Homo sapiens GN=TUBA1B PE=1 SV=1                           | TUBA1B   | 2  | 3 | 3 | 2 | 3 | 2  | 100,0 | 2,50 | 50,152  | 4,98E-02 |
| F5H5D3     | Tubulin alpha chain OS=Homo sapiens GN=TUBA1C PE=1 SV=1                              | TUBA1C   | 2  | 3 | 3 | 2 | 3 | 2  | 100,0 | 2,50 | 57,730  | 4,33E-02 |
| P04196     | Histidine-rich glycoprotein OS=Homo sapiens GN=HRG PE=1 SV=1                         | HRG      | 3  | 2 | 1 | 4 | 3 | 2  | 100,0 | 2,50 | 59,578  | 4,20E-02 |
| P26038     | Moesin OS=Homo sapiens GN=MSN PE=1 SV=3                                              | MSN      | 2  | 2 | 2 | 5 | 2 | 2  | 100,0 | 2,50 | 67,820  | 3,69E-02 |
| D6RGG3     | Collagen alpha-1(XII) chain OS=Homo sapiens GN=COL12A1 PE=1 SV=1                     | COL12A1  | 4  | 1 | 3 | 3 | 1 | 3  | 100,0 | 2,50 | 333,202 | 7,50E-03 |
| P62805     | Histone H4 OS=Homo sapiens GN=HIST1H4A PE=1 SV=2                                     | HIST1H4A | 1  | 3 | 1 | 2 | 4 | 3  | 100,0 | 2,33 | 11,367  | 2,05E-01 |

Table S6

|             |                                                                             |              |   |   |   |   |   |   |       |      |         |          |
|-------------|-----------------------------------------------------------------------------|--------------|---|---|---|---|---|---|-------|------|---------|----------|
| P00441      | Superoxide dismutase [Cu-Zn] OS=Homo sapiens GN=SOD1 PE=1 SV=2              | SOD1         | 0 | 2 | 3 | 3 | 3 | 3 | 83,3  | 2,33 | 15,936  | 1,46E-01 |
| P01033      | Metalloproteinase inhibitor 1 OS=Homo sapiens GN=TIMP1 PE=1 SV=1            | TIMP1        | 2 | 3 | 2 | 3 | 2 | 2 | 100,0 | 2,33 | 23,171  | 1,01E-01 |
| O43852      | Calumenin OS=Homo sapiens GN=CALU PE=1 SV=2                                 | CALU         | 1 | 3 | 0 | 2 | 3 | 5 | 83,3  | 2,33 | 37,107  | 6,29E-02 |
| P27797      | Calreticulin OS=Homo sapiens GN=CALR PE=1 SV=1                              | CALR         | 5 | 5 | 3 | 0 | 0 | 1 | 66,7  | 2,33 | 48,142  | 4,85E-02 |
| P50395      | Rab GDP dissociation inhibitor beta OS=Homo sapiens GN=GDI2 PE=1 SV=2       | GDI2         | 1 | 4 | 1 | 2 | 4 | 2 | 100,0 | 2,33 | 50,663  | 4,61E-02 |
| P06396      | Gelsolin OS=Homo sapiens GN=GSN PE=1 SV=1                                   | GSN          | 4 | 6 | 2 | 1 | 1 | 0 | 83,3  | 2,33 | 85,698  | 2,72E-02 |
| O60814      | Histone H2B type 1-K OS=Homo sapiens GN=HIST1H2BK PE=1 SV=3                 | HIST1H2BK    | 1 | 2 | 2 | 2 | 2 | 4 | 100,0 | 2,17 | 13,890  | 1,56E-01 |
| Q93079      | Histone H2B type 1-H OS=Homo sapiens GN=HIST1H2BH PE=1 SV=3                 | HIST1H2BH    | 1 | 2 | 2 | 2 | 2 | 4 | 100,0 | 2,17 | 13,892  | 1,56E-01 |
| P06899      | Histone H2B type 1-J OS=Homo sapiens GN=HIST1H2BJ PE=1 SV=3                 | HIST1H2BJ    | 1 | 2 | 2 | 2 | 2 | 4 | 100,0 | 2,17 | 13,904  | 1,56E-01 |
| P62807      | Histone H2B type 1-C/E/F/G/I OS=Homo sapiens GN=HIST1H2BC PE=1 SV=4         | HIST1H2BC    | 1 | 2 | 2 | 2 | 2 | 4 | 100,0 | 2,17 | 13,906  | 1,56E-01 |
| P23527      | Histone H2B type 1-O OS=Homo sapiens GN=HIST1H2BO PE=1 SV=3                 | HIST1H2BO    | 1 | 2 | 2 | 2 | 2 | 4 | 100,0 | 2,17 | 13,906  | 1,56E-01 |
| Q8N257      | Histone H2B type 3-B OS=Homo sapiens GN=HIST3H2BB PE=1 SV=3                 | HIST3H2BB    | 1 | 2 | 2 | 2 | 2 | 4 | 100,0 | 2,17 | 13,908  | 1,56E-01 |
| Q16778      | Histone H2B type 2-E OS=Homo sapiens GN=HIST2H2BE PE=1 SV=3                 | HIST2H2BE    | 1 | 2 | 2 | 2 | 2 | 4 | 100,0 | 2,17 | 13,920  | 1,56E-01 |
| Q5GNW6      | Histone H2B type 2-F OS=Homo sapiens GN=HIST2H2BF PE=1 SV=3                 | HIST2H2BF    | 1 | 2 | 2 | 2 | 2 | 4 | 100,0 | 2,17 | 13,920  | 1,56E-01 |
| P58876      | Histone H2B type 1-D OS=Homo sapiens GN=HIST1H2BD PE=1 SV=2                 | HIST1H2BD    | 1 | 2 | 2 | 2 | 2 | 4 | 100,0 | 2,17 | 13,936  | 1,55E-01 |
| P57053      | Histone H2B type F-S OS=Homo sapiens GN=H2BFS PE=1 SV=2                     | H2BFS        | 1 | 2 | 2 | 2 | 2 | 4 | 100,0 | 2,17 | 13,944  | 1,55E-01 |
| P33778      | Histone H2B type 1-B OS=Homo sapiens GN=HIST1H2BB PE=1 SV=2                 | HIST1H2BB    | 1 | 2 | 2 | 2 | 2 | 4 | 100,0 | 2,17 | 13,950  | 1,55E-01 |
| Q99880      | Histone H2B type 1-L OS=Homo sapiens GN=HIST1H2BL PE=1 SV=3                 | HIST1H2BL    | 1 | 2 | 2 | 2 | 2 | 4 | 100,0 | 2,17 | 13,952  | 1,55E-01 |
| Q99879      | Histone H2B type 1-M OS=Homo sapiens GN=HIST1H2BM PE=1 SV=3                 | HIST1H2BM    | 1 | 2 | 2 | 2 | 2 | 4 | 100,0 | 2,17 | 13,989  | 1,55E-01 |
| U3KQK0      | Histone H2B OS=Homo sapiens GN=HIST1H2BN PE=1 SV=1                          | HIST1H2BN    | 1 | 2 | 2 | 2 | 2 | 4 | 100,0 | 2,17 | 18,804  | 1,15E-01 |
| P61224      | Ras-related protein Rap-1b OS=Homo sapiens GN=RAP1B PE=1 SV=1               | RAP1B        | 0 | 0 | 3 | 4 | 3 | 3 | 66,7  | 2,17 | 20,825  | 1,04E-01 |
| P62834      | Ras-related protein Rap-1A OS=Homo sapiens GN=RAP1A PE=1 SV=1               | RAP1A        | 0 | 0 | 3 | 4 | 3 | 3 | 66,7  | 2,17 | 20,987  | 1,03E-01 |
| P10599      | Thioredoxin OS=Homo sapiens GN=TXN PE=1 SV=3                                | TXN          | 2 | 2 | 2 | 2 | 2 | 2 | 100,0 | 2,00 | 11,737  | 1,70E-01 |
| P01624      | Immunoglobulin kappa variable 3-15 OS=Homo sapiens GN=IGKV3-15 PE=1 SV=2    | IGKV3-15     | 2 | 2 | 2 | 2 | 2 | 2 | 100,0 | 2,00 | 12,496  | 1,60E-01 |
| A0A0C4DH90  | Protein IGKV3OR2-268 (Fragment) OS=Homo sapiens GN=IGKV3OR2-268 PE=4 SV=5   | IGKV3OR2-268 | 2 | 2 | 2 | 2 | 2 | 2 | 100,0 | 2,00 | 12,586  | 1,59E-01 |
| A0A075B6H7  | Protein IGKV3-7 (Fragment) OS=Homo sapiens GN=IGKV3-7 PE=1 SV=1             | IGKV3-7      | 2 | 2 | 2 | 2 | 2 | 2 | 100,0 | 2,00 | 12,783  | 1,56E-01 |
| A0A0C4DH55  | Protein IGKV3D-7 (Fragment) OS=Homo sapiens GN=IGKV3D-7 PE=4 SV=5           | IGKV3D-7     | 2 | 2 | 2 | 2 | 2 | 2 | 100,0 | 2,00 | 13,148  | 1,52E-01 |
| P37802      | Transgelin-2 OS=Homo sapiens GN=TAGLN2 PE=1 SV=3                            | TAGLN2       | 2 | 2 | 2 | 2 | 2 | 2 | 100,0 | 2,00 | 22,391  | 8,93E-02 |
| B9A064      | Immunoglobulin lambda-like polypeptide 5 OS=Homo sapiens GN=IGLL5 PE=2 SV=2 | IGLL5        | 0 | 0 | 0 | 0 | 7 | 5 | 33,3  | 2,00 | 23,063  | 8,67E-02 |
| Q92520      | Protein FAM3C OS=Homo sapiens GN=FAM3C PE=1 SV=1                            | FAM3C        | 2 | 2 | 2 | 2 | 2 | 2 | 100,0 | 2,00 | 24,680  | 8,10E-02 |
| P31946      | 14-3-3 protein beta/alpha OS=Homo sapiens GN=YWHAB PE=1 SV=3                | YWHAB        | 5 | 4 | 2 | 1 | 0 | 0 | 66,7  | 2,00 | 28,082  | 7,12E-02 |
| P07195      | L-lactate dehydrogenase B chain OS=Homo sapiens GN=LDHB PE=1 SV=2           | LDHB         | 0 | 3 | 2 | 3 | 2 | 2 | 83,3  | 2,00 | 36,638  | 5,46E-02 |
| P21810      | Biglycan OS=Homo sapiens GN=BGN PE=1 SV=2                                   | BGN          | 2 | 2 | 2 | 2 | 2 | 2 | 100,0 | 2,00 | 41,654  | 4,80E-02 |
| A0A0A0MTS2  | Glucose-6-phosphate isomerase (Fragment) OS=Homo sapiens GN=GPI PE=1 SV=1   | GPI          | 2 | 2 | 1 | 2 | 3 | 2 | 100,0 | 2,00 | 64,825  | 3,09E-02 |
| P15144      | Aminopeptidase N OS=Homo sapiens GN=ANPEP PE=1 SV=4                         | ANPEP        | 0 | 1 | 2 | 3 | 3 | 3 | 83,3  | 2,00 | 109,540 | 1,83E-02 |
| P06703      | Protein S100-A6 OS=Homo sapiens GN=S100A6 PE=1 SV=1                         | S100A6       | 1 | 2 | 2 | 2 | 2 | 2 | 100,0 | 1,83 | 10,180  | 1,80E-01 |
| S4R460      | Protein IGHV3OR16-9 OS=Homo sapiens GN=IGHV3OR16-9 PE=1 SV=2                | IGHV3OR16-9  | 1 | 2 | 2 | 2 | 2 | 2 | 100,0 | 1,83 | 10,429  | 1,76E-01 |
| A0A087VWV89 | Protein IGHV3-72 OS=Homo sapiens GN=IGHV3-72 PE=1 SV=1                      | IGHV3-72     | 1 | 2 | 2 | 2 | 2 | 2 | 100,0 | 1,83 | 13,203  | 1,39E-01 |
| Q96KK5      | Histone H2A type 1-H OS=Homo sapiens GN=HIST1H2AH PE=1 SV=3                 | HIST1H2AH    | 2 | 2 | 2 | 1 | 2 | 2 | 100,0 | 1,83 | 13,906  | 1,32E-01 |
| Q99878      | Histone H2A type 1-J OS=Homo sapiens GN=HIST1H2AJ PE=1 SV=3                 | HIST1H2AJ    | 2 | 2 | 2 | 1 | 2 | 2 | 100,0 | 1,83 | 13,936  | 1,32E-01 |
| Q16777      | Histone H2A type 2-C OS=Homo sapiens GN=HIST2H2AC PE=1 SV=4                 | HIST2H2AC    | 2 | 2 | 2 | 1 | 2 | 2 | 100,0 | 1,83 | 13,988  | 1,31E-01 |
| Q9BTM1      | Histone H2A.J OS=Homo sapiens GN=H2AFJ PE=1 SV=1                            | H2AFJ        | 2 | 2 | 2 | 1 | 2 | 2 | 100,0 | 1,83 | 14,019  | 1,31E-01 |
| P0C0S8      | Histone H2A type 1 OS=Homo sapiens GN=HIST1H2AG PE=1 SV=2                   | HIST1H2AG    | 2 | 2 | 2 | 1 | 2 | 2 | 100,0 | 1,83 | 14,091  | 1,30E-01 |
| Q6F113      | Histone H2A type 2-A OS=Homo sapiens GN=HIST2H2AA3 PE=1 SV=3                | HIST2H2AA3   | 2 | 2 | 2 | 1 | 2 | 2 | 100,0 | 1,83 | 14,095  | 1,30E-01 |
| Q93077      | Histone H2A type 1-C OS=Homo sapiens GN=HIST1H2AC PE=1 SV=3                 | HIST1H2AC    | 2 | 2 | 2 | 1 | 2 | 2 | 100,0 | 1,83 | 14,105  | 1,30E-01 |
| P20671      | Histone H2A type 1-D OS=Homo sapiens GN=HIST1H2AD PE=1 SV=2                 | HIST1H2AD    | 2 | 2 | 2 | 1 | 2 | 2 | 100,0 | 1,83 | 14,107  | 1,30E-01 |
| Q7L7L0      | Histone H2A type 3 OS=Homo sapiens GN=HIST3H2A PE=1 SV=3                    | HIST3H2A     | 2 | 2 | 2 | 1 | 2 | 2 | 100,0 | 1,83 | 14,121  | 1,30E-01 |
| P04908      | Histone H2A type 1-B/E OS=Homo sapiens GN=HIST1H2AB PE=1 SV=2               | HIST1H2AB    | 2 | 2 | 2 | 1 | 2 | 2 | 100,0 | 1,83 | 14,135  | 1,30E-01 |
| A0A0U1RRH7  | Histone H2A OS=Homo sapiens PE=3 SV=1                                       | HIST1H3D     | 2 | 2 | 2 | 1 | 2 | 2 | 100,0 | 1,83 | 18,553  | 9,88E-02 |
| P07093      | Glia-derived nexin OS=Homo sapiens GN=SERPINE2 PE=1 SV=1                    | SERPINE2     | 2 | 1 | 2 | 2 | 2 | 2 | 100,0 | 1,83 | 44,002  | 4,17E-02 |
| P50454      | Serpin H1 OS=Homo sapiens GN=SERPINH1 PE=1 SV=2                             | SERPINH1     | 2 | 3 | 2 | 1 | 2 | 1 | 100,0 | 1,83 | 46,441  | 3,95E-02 |
| P00734      | Prothrombin OS=Homo sapiens GN=F2 PE=1 SV=2                                 | F2           | 0 | 1 | 3 | 3 | 2 | 2 | 83,3  | 1,83 | 70,037  | 2,62E-02 |
| Q13201      | Multimerin-1 OS=Homo sapiens GN=MMRN1 PE=1 SV=3                             | MMRN1        | 0 | 2 | 2 | 1 | 2 | 4 | 83,3  | 1,83 | 138,110 | 1,33E-02 |
| P04433      | Immunoglobulin kappa variable 3-11 OS=Homo sapiens GN=IGKV3-11 PE=1 SV=1    | IGKV3-11     | 1 | 2 | 1 | 2 | 2 | 2 | 100,0 | 1,67 | 12,575  | 1,33E-01 |
| A0A0A0MRZ8  | Protein IGKV3D-11 (Fragment) OS=Homo sapiens GN=IGKV3D-11 PE=4 SV=6         | IGKV3D-11    | 1 | 2 | 1 | 2 | 2 | 2 | 100,0 | 1,67 | 12,625  | 1,32E-01 |
| Q9BRK5      | 45 kDa calcium-binding protein OS=Homo sapiens GN=SDF4 PE=1 SV=1            | SDF4         | 3 | 1 | 0 | 2 | 2 | 2 | 83,3  | 1,67 | 41,807  | 3,99E-02 |
| Q562R1      | Beta-actin-like protein 2 OS=Homo sapiens GN=ACTBL2 PE=1 SV=2               | ACTBL2       | 5 | 0 | 0 | 0 | 5 | 0 | 33,3  | 1,67 | 42,003  | 3,97E-02 |

Table S6

|             |                                                                                     |               |   |   |   |   |   |   |       |      |         |          |
|-------------|-------------------------------------------------------------------------------------|---------------|---|---|---|---|---|---|-------|------|---------|----------|
| Q71U36      | Tubulin alpha-1A chain OS=Homo sapiens GN=TUBA1A PE=1 SV=1                          | TUBA1A        | 0 | 0 | 3 | 2 | 3 | 2 | 66,7  | 1,67 | 50,136  | 3,32E-02 |
| P35241      | Radixin OS=Homo sapiens GN=RDX PE=1 SV=1                                            | RDX           | 2 | 2 | 2 | 0 | 2 | 2 | 83,3  | 1,67 | 68,564  | 2,43E-02 |
| E7EQR4      | Ezrin OS=Homo sapiens GN=EZR PE=1 SV=3                                              | EZR           | 2 | 2 | 2 | 0 | 2 | 2 | 83,3  | 1,67 | 69,372  | 2,40E-02 |
| P05386      | 60S acidic ribosomal protein P1 OS=Homo sapiens GN=RPLP1 PE=1 SV=1                  | RPLP1         | 2 | 2 | 2 | 0 | 1 | 2 | 83,3  | 1,50 | 11,514  | 1,30E-01 |
| AOA075B6P5  | Immunoglobulin kappa variable 2-28 OS=Homo sapiens GN=IGKV2-28 PE=3 SV=1            | IGKV2-28      | 0 | 2 | 2 | 2 | 1 | 2 | 83,3  | 1,50 | 12,957  | 1,16E-01 |
| AOA075B6S2  | Protein IGKV2D-29 (Fragment) OS=Homo sapiens GN=IGKV2D-29 PE=1 SV=1                 | IGKV2D-29     | 0 | 2 | 2 | 2 | 1 | 2 | 83,3  | 1,50 | 13,143  | 1,14E-01 |
| P06310      | Immunoglobulin kappa variable 2-30 OS=Homo sapiens GN=IGKV2-30 PE=3 SV=2            | IGKV2-30      | 0 | 2 | 2 | 2 | 1 | 2 | 83,3  | 1,50 | 13,185  | 1,14E-01 |
| AOA075B6S6  | Immunoglobulin kappa variable 2D-30 OS=Homo sapiens GN=IGKV2D-30 PE=3 SV=1          | IGKV2D-30     | 0 | 2 | 2 | 2 | 1 | 2 | 83,3  | 1,50 | 13,215  | 1,14E-01 |
| AOA0A0MRZ7  | Protein IGKV2D-26 (Fragment) OS=Homo sapiens GN=IGKV2D-26 PE=4 SV=1                 | IGKV2D-26     | 0 | 2 | 2 | 2 | 1 | 2 | 83,3  | 1,50 | 13,297  | 1,13E-01 |
| AOA087VWV87 | Protein IGKV2-40 (Fragment) OS=Homo sapiens GN=IGKV2-40 PE=1 SV=1                   | IGKV2-40      | 0 | 2 | 2 | 2 | 1 | 2 | 83,3  | 1,50 | 13,310  | 1,13E-01 |
| P01614      | Immunoglobulin kappa variable 2D-40 OS=Homo sapiens GN=IGKV2D-40 PE=1 SV=2          | IGKV2D-40     | 0 | 2 | 2 | 2 | 1 | 2 | 83,3  | 1,50 | 13,310  | 1,13E-01 |
| P01860      | Ig gamma-3 chain C region OS=Homo sapiens GN=IGHG3 PE=1 SV=2                        | IGHG3         | 9 | 0 | 0 | 0 | 0 | 0 | 16,7  | 1,50 | 41,287  | 3,63E-02 |
| P78539      | Sushi repeat-containing protein SRPX OS=Homo sapiens GN=SRPX PE=1 SV=1              | SRPX          | 0 | 2 | 2 | 1 | 2 | 2 | 83,3  | 1,50 | 51,572  | 2,91E-02 |
| P55072      | Transitional endoplasmic reticulum ATPase OS=Homo sapiens GN=VCP PE=1 SV=4          | VCP           | 2 | 1 | 2 | 2 | 1 | 1 | 100,0 | 1,50 | 89,322  | 1,68E-02 |
| Q14624      | Inter-alpha-trypsin inhibitor heavy chain H4 OS=Homo sapiens GN=ITI4 PE=1 SV=4      | ITI4          | 3 | 1 | 1 | 2 | 1 | 1 | 100,0 | 1,50 | 103,357 | 1,45E-02 |
| P35442      | Thrombospondin-2 OS=Homo sapiens GN=THBS2 PE=1 SV=2                                 | THBS2         | 3 | 3 | 1 | 0 | 1 | 1 | 83,3  | 1,50 | 129,991 | 1,15E-02 |
| P02776      | Platelet factor 4 OS=Homo sapiens GN=PF4 PE=1 SV=2                                  | PF4           | 0 | 1 | 2 | 1 | 2 | 2 | 83,3  | 1,33 | 10,845  | 1,23E-01 |
| P10720      | Platelet factor 4 variant OS=Homo sapiens GN=PF4V1 PE=1 SV=1                        | PF4V1         | 0 | 1 | 2 | 1 | 2 | 2 | 83,3  | 1,33 | 11,553  | 1,15E-01 |
| P61769      | Beta-2-microglobulin OS=Homo sapiens GN=B2M PE=1 SV=1                               | B2M           | 1 | 2 | 1 | 1 | 2 | 1 | 100,0 | 1,33 | 13,715  | 9,72E-02 |
| P16035      | Metalloproteinase inhibitor 2 OS=Homo sapiens GN=TIMP2 PE=1 SV=2                    | TIMP2         | 0 | 0 | 2 | 2 | 2 | 2 | 66,7  | 1,33 | 24,399  | 5,46E-02 |
| P02649      | Apolipoprotein E OS=Homo sapiens GN=APOE PE=1 SV=1                                  | APOE          | 1 | 1 | 0 | 2 | 2 | 2 | 83,3  | 1,33 | 36,154  | 3,69E-02 |
| Q14CN4      | Keratin, type II cytoskeletal 72 OS=Homo sapiens GN=KRT72 PE=1 SV=2                 | KRT72         | 2 | 2 | 2 | 1 | 1 | 0 | 83,3  | 1,33 | 55,877  | 2,39E-02 |
| Q3SY84      | Keratin, type II cytoskeletal 71 OS=Homo sapiens GN=KRT71 PE=1 SV=3                 | KRT71         | 2 | 2 | 2 | 1 | 1 | 0 | 83,3  | 1,33 | 57,292  | 2,33E-02 |
| Q86Y46      | Keratin, type II cytoskeletal 73 OS=Homo sapiens GN=KRT73 PE=1 SV=1                 | KRT73         | 2 | 2 | 2 | 1 | 1 | 0 | 83,3  | 1,33 | 58,923  | 2,26E-02 |
| F8W1S1      | Keratin, type II cytoskeletal 74 OS=Homo sapiens GN=KRT74 PE=1 SV=1                 | KRT74         | 2 | 2 | 2 | 1 | 1 | 0 | 83,3  | 1,33 | 59,407  | 2,24E-02 |
| P00751      | Complement factor B OS=Homo sapiens GN=CFB PE=1 SV=2                                | CFB           | 4 | 3 | 1 | 0 | 0 | 0 | 50,0  | 1,33 | 85,533  | 1,56E-02 |
| P00747      | Plasminogen OS=Homo sapiens GN=PLG PE=1 SV=2                                        | PLG           | 1 | 3 | 2 | 2 | 0 | 0 | 66,7  | 1,33 | 90,569  | 1,47E-02 |
| B4E1Z4      | Uncharacterized protein OS=Homo sapiens PE=1 SV=1                                   | C2            | 4 | 3 | 1 | 0 | 0 | 0 | 50,0  | 1,33 | 140,943 | 9,46E-03 |
| Q14767      | Latent-transforming growth factor beta-binding protein 2 OS=Homo sapiens GN=LTBP2 F | LTBP2         | 2 | 1 | 1 | 2 | 1 | 1 | 100,0 | 1,33 | 195,052 | 6,84E-03 |
| P09382      | Galectin-1 OS=Homo sapiens GN=LGALS1 PE=1 SV=2                                      | LGALS1        | 0 | 1 | 2 | 2 | 1 | 1 | 83,3  | 1,17 | 14,716  | 7,93E-02 |
| P07737      | Profilin-1 OS=Homo sapiens GN=PFN1 PE=1 SV=2                                        | PFN1          | 2 | 0 | 2 | 2 | 1 | 0 | 66,7  | 1,17 | 15,054  | 7,75E-02 |
| AOA087VWVU8 | Tropomyosin alpha-3 chain OS=Homo sapiens GN=TPM3 PE=1 SV=1                         | TPM3          | 3 | 0 | 0 | 4 | 0 | 0 | 33,3  | 1,17 | 26,421  | 4,42E-02 |
| Q5HYB6      | Epididymis luminal protein 189 OS=Homo sapiens GN=DKFZp686J1372 PE=1 SV=1           | DKFZp686J1372 | 3 | 0 | 0 | 4 | 0 | 0 | 33,3  | 1,17 | 27,176  | 4,29E-02 |
| Q08380      | Galectin-3-binding protein OS=Homo sapiens GN=LGALS3BP PE=1 SV=1                    | LGALS3BP      | 1 | 0 | 1 | 2 | 2 | 1 | 83,3  | 1,17 | 65,331  | 1,79E-02 |
| P55268      | Laminin subunit beta-2 OS=Homo sapiens GN=LAMB2 PE=1 SV=2                           | LAMB2         | 3 | 1 | 1 | 1 | 1 | 0 | 83,3  | 1,17 | 195,981 | 5,95E-03 |
| P31949      | Protein S100-A11 OS=Homo sapiens GN=S100A11 PE=1 SV=2                               | S100A11       | 0 | 1 | 0 | 2 | 2 | 1 | 66,7  | 1,00 | 11,740  | 8,52E-02 |
| P20618      | Proteasome subunit beta type-1 OS=Homo sapiens GN=PSMB1 PE=1 SV=2                   | PSMB1         | 1 | 0 | 1 | 1 | 1 | 2 | 83,3  | 1,00 | 26,489  | 3,78E-02 |
| P29966      | Myristoylated alanine-rich C-kinase substrate OS=Homo sapiens GN=MARCKS PE=1 SV     | MARCKS        | 2 | 0 | 2 | 2 | 0 | 0 | 50,0  | 1,00 | 31,555  | 3,17E-02 |
| Q969T7      | 7-methylguanosine phosphate-specific 5'-nucleotidase OS=Homo sapiens GN=NT5C3B I    | NT5C3B        | 0 | 3 | 0 | 0 | 1 | 2 | 50,0  | 1,00 | 34,389  | 2,91E-02 |
| P02760      | Protein AMBP OS=Homo sapiens GN=AMBP PE=1 SV=1                                      | AMBP          | 1 | 2 | 0 | 0 | 2 | 1 | 66,7  | 1,00 | 38,999  | 2,56E-02 |
| J3KPS3      | Fructose-bisphosphate aldolase OS=Homo sapiens GN=ALDOA PE=1 SV=1                   | ALDOA         | 0 | 0 | 1 | 2 | 1 | 2 | 66,7  | 1,00 | 39,817  | 2,51E-02 |
| P00326      | Alcohol dehydrogenase 1C OS=Homo sapiens GN=ADH1C PE=1 SV=2                         | ADH1C         | 2 | 1 | 1 | 2 | 0 | 0 | 66,7  | 1,00 | 39,868  | 2,51E-02 |
| P11142      | Heat shock cognate 71 kDa protein OS=Homo sapiens GN=HSPA8 PE=1 SV=1                | HSPA8         | 0 | 0 | 0 | 3 | 2 | 1 | 50,0  | 1,00 | 70,898  | 1,41E-02 |
| P11021      | 78 kDa glucose-regulated protein OS=Homo sapiens GN=HSPA5 PE=1 SV=2                 | HSPA5         | 0 | 0 | 3 | 0 | 2 | 1 | 50,0  | 1,00 | 72,333  | 1,38E-02 |
| P53675      | Clathrin heavy chain 2 OS=Homo sapiens GN=CLTCL1 PE=1 SV=2                          | CLTCL1        | 0 | 1 | 2 | 2 | 1 | 0 | 66,7  | 1,00 | 187,030 | 5,35E-03 |
| AOA087VWVQ6 | Clathrin heavy chain OS=Homo sapiens GN=CLTC PE=1 SV=1                              | CLTC          | 0 | 1 | 2 | 2 | 1 | 0 | 66,7  | 1,00 | 192,058 | 5,21E-03 |
| P27348      | 14-3-3 protein theta OS=Homo sapiens GN=YWHAQ PE=1 SV=1                             | YWHAQ         | 2 | 3 | 0 | 0 | 0 | 0 | 33,3  | 0,83 | 27,764  | 3,00E-02 |
| P61981      | 14-3-3 protein gamma OS=Homo sapiens GN=YWHAG PE=1 SV=2                             | YWHAG         | 3 | 0 | 1 | 1 | 0 | 0 | 50,0  | 0,83 | 28,303  | 2,94E-02 |
| P27105      | Erythrocyte band 7 integral membrane protein OS=Homo sapiens GN=STOM PE=1 SV=1      | STOM          | 1 | 0 | 1 | 2 | 1 | 0 | 66,7  | 0,83 | 31,731  | 2,63E-02 |
| Q15113      | Procollagen C-endopeptidase enhancer 1 OS=Homo sapiens GN=PCOLCE PE=1 SV=2          | PCOLCE        | 2 | 1 | 2 | 0 | 0 | 0 | 50,0  | 0,83 | 47,972  | 1,74E-02 |
| Q16881      | Thioredoxin reductase 1, cytoplasmic OS=Homo sapiens GN=TXNRD1 PE=1 SV=3            | TXNRD1        | 0 | 1 | 1 | 1 | 1 | 1 | 83,3  | 0,83 | 70,906  | 1,18E-02 |
| P24821      | Tenascin OS=Homo sapiens GN=TNC PE=1 SV=3                                           | TNC           | 0 | 0 | 1 | 2 | 0 | 2 | 50,0  | 0,83 | 240,853 | 3,46E-03 |
| H7BZJ8      | Zinc-alpha-2-glycoprotein (Fragment) OS=Homo sapiens GN=AZGP1 PE=1 SV=1             | AZGP1         | 0 | 0 | 0 | 2 | 1 | 1 | 50,0  | 0,67 | 9,709   | 6,87E-02 |
| P62937      | Peptidyl-prolyl cis-trans isomerase A OS=Homo sapiens GN=PPIA PE=1 SV=2             | PPIA          | 1 | 0 | 2 | 1 | 0 | 0 | 50,0  | 0,67 | 18,012  | 3,70E-02 |
| B8ZZZ5      | PH and SEC7 domain-containing protein 4 (Fragment) OS=Homo sapiens GN=PSD4 PE       | PSD4          | 2 | 0 | 0 | 0 | 0 | 2 | 33,3  | 0,67 | 19,927  | 3,35E-02 |
| C9IZN3      | Actin-related protein 3C (Fragment) OS=Homo sapiens GN=ACTR3C PE=3 SV=1             | ACTR3C        | 1 | 1 | 1 | 0 | 0 | 1 | 66,7  | 0,67 | 24,320  | 2,74E-02 |
| P40926      | Malate dehydrogenase, mitochondrial OS=Homo sapiens GN=MDH2 PE=1 SV=3               | MDH2          | 0 | 0 | 1 | 0 | 2 | 1 | 50,0  | 0,67 | 35,503  | 1,88E-02 |

Table S6

|            |                                                                                        |           |   |   |   |   |   |   |      |      |         |          |
|------------|----------------------------------------------------------------------------------------|-----------|---|---|---|---|---|---|------|------|---------|----------|
| E9PF18     | Hydroxyacyl-coenzyme A dehydrogenase, mitochondrial OS=Homo sapiens GN=HADH F          | HADH      | 0 | 1 | 1 | 1 | 1 | 0 | 66,7 | 0,67 | 42,123  | 1,58E-02 |
| P61158     | Actin-related protein 3 OS=Homo sapiens GN=ACTR3 PE=1 SV=3                             | ACTR3     | 1 | 1 | 1 | 0 | 0 | 1 | 66,7 | 0,67 | 47,371  | 1,41E-02 |
| Q9P1U1     | Actin-related protein 3B OS=Homo sapiens GN=ACTR3B PE=2 SV=1                           | ACTR3B    | 1 | 1 | 1 | 0 | 0 | 1 | 66,7 | 0,67 | 47,608  | 1,40E-02 |
| P07437     | Tubulin beta chain OS=Homo sapiens GN=TUBB PE=1 SV=2                                   | TUBB      | 1 | 0 | 2 | 1 | 0 | 0 | 50,0 | 0,67 | 49,671  | 1,34E-02 |
| P68371     | Tubulin beta-4B chain OS=Homo sapiens GN=TUBB4B PE=1 SV=1                              | TUBB4B    | 1 | 0 | 2 | 1 | 0 | 0 | 50,0 | 0,67 | 49,831  | 1,34E-02 |
| Q13885     | Tubulin beta-2A chain OS=Homo sapiens GN=TUBB2A PE=1 SV=1                              | TUBB2A    | 1 | 0 | 2 | 1 | 0 | 0 | 50,0 | 0,67 | 49,907  | 1,34E-02 |
| Q9BVA1     | Tubulin beta-2B chain OS=Homo sapiens GN=TUBB2B PE=1 SV=1                              | TUBB2B    | 1 | 0 | 2 | 1 | 0 | 0 | 50,0 | 0,67 | 49,953  | 1,33E-02 |
| P02545     | Prelamin-A/C OS=Homo sapiens GN=LMNA PE=1 SV=1                                         | LMNA      | 1 | 1 | 1 | 1 | 0 | 0 | 66,7 | 0,67 | 74,139  | 8,99E-03 |
| P98095     | Fibulin-2 OS=Homo sapiens GN=FBLN2 PE=1 SV=2                                           | FBLN2     | 0 | 2 | 1 | 1 | 0 | 0 | 50,0 | 0,67 | 126,573 | 5,27E-03 |
| P01031     | Complement C5 OS=Homo sapiens GN=C5 PE=1 SV=4                                          | C5        | 2 | 2 | 0 | 0 | 0 | 0 | 33,3 | 0,67 | 188,305 | 3,54E-03 |
| Q4LDE5     | Sushi, von Willebrand factor type A, EGF and pentraxin domain-containing protein 1 OS= | SVEP1     | 1 | 2 | 0 | 0 | 1 | 0 | 50,0 | 0,67 | 390,170 | 1,71E-03 |
| Q9H299     | SH3 domain-binding glutamic acid-rich-like protein 3 OS=Homo sapiens GN=SH3BGRL3       | SH3BGRL3  | 0 | 0 | 0 | 0 | 1 | 2 | 33,3 | 0,50 | 10,438  | 4,79E-02 |
| AOA0C4DH25 | Immunoglobulin kappa variable 3-20 OS=Homo sapiens GN=IGKV3D-20 PE=3 SV=1              | IGKV3D-20 | 2 | 0 | 0 | 1 | 0 | 0 | 33,3 | 0,50 | 12,515  | 4,00E-02 |
| P01602     | Immunoglobulin kappa variable 1-5 OS=Homo sapiens GN=IGKV1-5 PE=1 SV=2                 | IGKV1-5   | 0 | 2 | 1 | 0 | 0 | 0 | 33,3 | 0,50 | 12,782  | 3,91E-02 |
| P06312     | Immunoglobulin kappa variable 4-1 OS=Homo sapiens GN=IGKV4-1 PE=1 SV=1                 | IGKV4-1   | 0 | 0 | 0 | 0 | 1 | 2 | 33,3 | 0,50 | 13,380  | 3,74E-02 |
| D6RHJ6     | Immunoglobulin J chain (Fragment) OS=Homo sapiens GN=JCHAIN PE=1 SV=1                  | JCHAIN    | 2 | 0 | 1 | 0 | 0 | 0 | 33,3 | 0,50 | 17,679  | 2,83E-02 |
| P43235     | Cathepsin K OS=Homo sapiens GN=CTSK PE=1 SV=1                                          | CTSK      | 1 | 1 | 1 | 0 | 0 | 0 | 50,0 | 0,50 | 36,966  | 1,35E-02 |
| P07711     | Cathepsin L1 OS=Homo sapiens GN=CTSL PE=1 SV=2                                         | CTSL      | 2 | 0 | 1 | 0 | 0 | 0 | 33,3 | 0,50 | 37,564  | 1,33E-02 |
| P07355     | Annexin A2 OS=Homo sapiens GN=ANXA2 PE=1 SV=2                                          | ANXA2     | 0 | 0 | 1 | 0 | 0 | 2 | 33,3 | 0,50 | 38,604  | 1,30E-02 |
| A6NMY6     | Putative annexin A2-like protein OS=Homo sapiens GN=ANXA2P2 PE=5 SV=2                  | ANXA2P2   | 0 | 0 | 1 | 0 | 0 | 2 | 33,3 | 0,50 | 38,659  | 1,29E-02 |
| P48741     | Putative heat shock 70 kDa protein 7 OS=Homo sapiens GN=HSPA7 PE=5 SV=2                | HSPA7     | 0 | 1 | 0 | 0 | 0 | 2 | 33,3 | 0,50 | 40,244  | 1,24E-02 |
| P06727     | Apolipoprotein A-IV OS=Homo sapiens GN=APOA4 PE=1 SV=3                                 | APOA4     | 1 | 1 | 0 | 0 | 0 | 1 | 50,0 | 0,50 | 45,399  | 1,10E-02 |
| P68104     | Elongation factor 1-alpha 1 OS=Homo sapiens GN=EEF1A1 PE=1 SV=1                        | EEF1A1    | 2 | 0 | 0 | 0 | 1 | 0 | 33,3 | 0,50 | 50,141  | 9,97E-03 |
| Q5VTE0     | Putative elongation factor 1-alpha-like 3 OS=Homo sapiens GN=EEF1A1P5 PE=5 SV=1        | EEF1A1P5  | 2 | 0 | 0 | 0 | 1 | 0 | 33,3 | 0,50 | 50,185  | 9,96E-03 |
| Q01518     | Adenylyl cyclase-associated protein 1 OS=Homo sapiens GN=CAP1 PE=1 SV=5                | CAP1      | 1 | 1 | 0 | 0 | 1 | 0 | 50,0 | 0,50 | 51,901  | 9,63E-03 |
| P08697     | Alpha-2-antiplasmin OS=Homo sapiens GN=SERPINF2 PE=1 SV=3                              | SERPINF2  | 1 | 0 | 1 | 1 | 0 | 0 | 50,0 | 0,50 | 54,566  | 9,16E-03 |
| P40227     | T-complex protein 1 subunit zeta OS=Homo sapiens GN=CCT6A PE=1 SV=3                    | CCT6A     | 0 | 1 | 0 | 1 | 1 | 0 | 50,0 | 0,50 | 58,024  | 8,62E-03 |
| P36871     | Phosphoglucomutase-1 OS=Homo sapiens GN=PGM1 PE=1 SV=3                                 | PGM1      | 0 | 0 | 1 | 1 | 1 | 0 | 50,0 | 0,50 | 61,449  | 8,14E-03 |
| P54652     | Heat shock-related 70 kDa protein 2 OS=Homo sapiens GN=HSPA2 PE=1 SV=1                 | HSPA2     | 0 | 0 | 0 | 0 | 2 | 1 | 33,3 | 0,50 | 70,021  | 7,14E-03 |
| P34931     | Heat shock 70 kDa protein 1-like OS=Homo sapiens GN=HSPA1L PE=1 SV=2                   | HSPA1L    | 0 | 0 | 0 | 0 | 2 | 1 | 33,3 | 0,50 | 70,375  | 7,10E-03 |
| P17066     | Heat shock 70 kDa protein 6 OS=Homo sapiens GN=HSPA6 PE=1 SV=2                         | HSPA6     | 0 | 1 | 0 | 0 | 0 | 2 | 33,3 | 0,50 | 71,028  | 7,04E-03 |
| O00391     | Sulfhydryl oxidase 1 OS=Homo sapiens GN=QSOX1 PE=1 SV=3                                | QSOX1     | 0 | 0 | 1 | 1 | 0 | 1 | 50,0 | 0,50 | 82,578  | 6,05E-03 |
| Q9Y6C2     | EMILIN-1 OS=Homo sapiens GN=EMILIN1 PE=1 SV=2                                          | EMILIN1   | 1 | 1 | 0 | 0 | 1 | 0 | 50,0 | 0,50 | 106,667 | 4,69E-03 |
| P35579     | Myosin-9 OS=Homo sapiens GN=MYH9 PE=1 SV=4                                             | MYH9      | 1 | 0 | 0 | 0 | 0 | 2 | 33,3 | 0,50 | 226,532 | 2,21E-03 |
| P62314     | Small nuclear ribonucleoprotein Sm D1 OS=Homo sapiens GN=SNRPD1 PE=1 SV=1              | SNRPD1    | 0 | 0 | 2 | 0 | 0 | 0 | 16,7 | 0,33 | 13,282  | 2,51E-02 |
| P41222     | Prostaglandin-H2 D-isomerase OS=Homo sapiens GN=PTGDS PE=1 SV=1                        | PTGDS     | 2 | 0 | 0 | 0 | 0 | 0 | 16,7 | 0,33 | 21,029  | 1,59E-02 |
| E9PK25     | Cofilin-1 OS=Homo sapiens GN=CFL1 PE=1 SV=1                                            | CFL1      | 1 | 1 | 0 | 0 | 0 | 0 | 33,3 | 0,33 | 22,728  | 1,47E-02 |
| P02743     | Serum amyloid P-component OS=Homo sapiens GN=APCS PE=1 SV=2                            | APCS      | 2 | 0 | 0 | 0 | 0 | 0 | 16,7 | 0,33 | 25,387  | 1,31E-02 |
| B726Z4     | Myosin light polypeptide 6 OS=Homo sapiens GN=MYL6 PE=1 SV=1                           | MYL6      | 0 | 1 | 0 | 0 | 0 | 1 | 33,3 | 0,33 | 26,707  | 1,25E-02 |
| Q15404     | Ras suppressor protein 1 OS=Homo sapiens GN=RSU1 PE=1 SV=3                             | RSU1      | 0 | 2 | 0 | 0 | 0 | 0 | 16,7 | 0,33 | 31,540  | 1,06E-02 |
| P07327     | Alcohol dehydrogenase 1A OS=Homo sapiens GN=ADH1A PE=1 SV=2                            | ADH1A     | 0 | 0 | 0 | 2 | 0 | 0 | 16,7 | 0,33 | 39,859  | 8,36E-03 |
| P18464     | HLA class I histocompatibility antigen, B-51 alpha chain OS=Homo sapiens GN=HLA-B F    | HLA-B     | 0 | 0 | 0 | 1 | 1 | 0 | 33,3 | 0,33 | 40,566  | 8,22E-03 |
| Q9BYZ2     | L-lactate dehydrogenase A-like 6B OS=Homo sapiens GN=LDHAL6B PE=1 SV=3                 | LDHAL6B   | 0 | 0 | 0 | 2 | 0 | 0 | 16,7 | 0,33 | 41,943  | 7,95E-03 |
| P36222     | Chitinase-3-like protein 1 OS=Homo sapiens GN=CHI3L1 PE=1 SV=2                         | CHI3L1    | 0 | 2 | 0 | 0 | 0 | 0 | 16,7 | 0,33 | 42,625  | 7,82E-03 |
| P54727     | UV excision repair protein RAD23 homolog B OS=Homo sapiens GN=RAD23B PE=1 SV           | RAD23B    | 0 | 1 | 1 | 0 | 0 | 0 | 33,3 | 0,33 | 43,171  | 7,72E-03 |
| A2BF26     | HLA class I histocompatibility antigen, Cw-6 alpha chain OS=Homo sapiens GN=HLA-C F    | HLA-C     | 0 | 0 | 0 | 1 | 1 | 0 | 33,3 | 0,33 | 44,532  | 7,49E-03 |
| Q9H4B7     | Tubulin beta-1 chain OS=Homo sapiens GN=TUBB1 PE=1 SV=1                                | TUBB1     | 0 | 0 | 1 | 1 | 0 | 0 | 33,3 | 0,33 | 50,327  | 6,62E-03 |
| Q13509     | Tubulin beta-3 chain OS=Homo sapiens GN=TUBB3 PE=1 SV=2                                | TUBB3     | 1 | 0 | 0 | 1 | 0 | 0 | 33,3 | 0,33 | 50,433  | 6,61E-03 |
| P24347     | Stromelysin-3 OS=Homo sapiens GN=MMP11 PE=1 SV=3                                       | MMP11     | 2 | 0 | 0 | 0 | 0 | 0 | 16,7 | 0,33 | 54,590  | 6,11E-03 |
| P05546     | Heparin cofactor 2 OS=Homo sapiens GN=SERPIND1 PE=1 SV=3                               | SERPIND1  | 0 | 0 | 1 | 0 | 0 | 1 | 33,3 | 0,33 | 57,071  | 5,84E-03 |
| O95800     | Probable G-protein coupled receptor 75 OS=Homo sapiens GN=GPR75 PE=1 SV=1              | GPR75     | 0 | 1 | 1 | 0 | 0 | 0 | 33,3 | 0,33 | 59,359  | 5,62E-03 |
| P22792     | Carboxypeptidase N subunit 2 OS=Homo sapiens GN=CPN2 PE=1 SV=3                         | CPN2      | 0 | 1 | 0 | 0 | 1 | 0 | 33,3 | 0,33 | 60,557  | 5,50E-03 |
| Q15942     | Zyxin OS=Homo sapiens GN=ZYX PE=1 SV=1                                                 | ZYX       | 1 | 0 | 1 | 0 | 0 | 0 | 33,3 | 0,33 | 61,277  | 5,44E-03 |
| Q14956     | Transmembrane glycoprotein NMB OS=Homo sapiens GN=GPNMB PE=1 SV=2                      | GPNMB     | 1 | 1 | 0 | 0 | 0 | 0 | 33,3 | 0,33 | 63,923  | 5,21E-03 |
| Q9C0D0     | Phosphatase and actin regulator 1 OS=Homo sapiens GN=PHACTR1 PE=1 SV=3                 | PHACTR1   | 0 | 0 | 0 | 1 | 0 | 1 | 33,3 | 0,33 | 66,308  | 5,03E-03 |
| PODMV9     | Heat shock 70 kDa protein 1B OS=Homo sapiens GN=HSPA1B PE=1 SV=1                       | HSPA1B    | 0 | 0 | 0 | 0 | 2 | 0 | 16,7 | 0,33 | 70,052  | 4,76E-03 |
| P13639     | Elongation factor 2 OS=Homo sapiens GN=EEF2 PE=1 SV=4                                  | EEF2      | 1 | 1 | 0 | 0 | 0 | 0 | 33,3 | 0,33 | 95,338  | 3,50E-03 |

Table S6

|            |                                                                                           |              |   |   |   |   |   |   |      |      |         |          |
|------------|-------------------------------------------------------------------------------------------|--------------|---|---|---|---|---|---|------|------|---------|----------|
| E7EUF1     | Ectonucleotide pyrophosphatase/phosphodiesterase family member 2 OS=Homo sapiens          | ENPP2        | 2 | 0 | 0 | 0 | 0 | 0 | 16,7 | 0,33 | 101,553 | 3,28E-03 |
| Q9POK7     | Ankyrin OS=Homo sapiens GN=RAI14 PE=1 SV=2                                                | RAI14        | 0 | 0 | 0 | 1 | 0 | 1 | 33,3 | 0,33 | 110,041 | 3,03E-03 |
| A0A087VXW9 | Collagen alpha-1(V) chain OS=Homo sapiens GN=COL5A1 PE=1 SV=1                             | COL5A1       | 0 | 0 | 1 | 0 | 0 | 1 | 33,3 | 0,33 | 183,653 | 1,82E-03 |
| P82921     | 28S ribosomal protein S21, mitochondrial OS=Homo sapiens GN=MRPS21 PE=1 SV=2              | MRPS21       | 0 | 0 | 1 | 0 | 0 | 0 | 16,7 | 0,17 | 10,742  | 1,55E-02 |
| P01717     | Immunoglobulin lambda variable 3-25 OS=Homo sapiens GN=IGLV3-25 PE=1 SV=2                 | IGLV3-25     | 0 | 0 | 1 | 0 | 0 | 0 | 16,7 | 0,17 | 12,011  | 1,39E-02 |
| Q8WWY7     | WAP four-disulfide core domain protein 12 OS=Homo sapiens GN=WFDC12 PE=2 SV=1             | WFDC12       | 0 | 1 | 0 | 0 | 0 | 0 | 16,7 | 0,17 | 12,050  | 1,38E-02 |
| P01718     | Immunoglobulin lambda variable 3-27 OS=Homo sapiens GN=IGLV3-27 PE=1 SV=2                 | IGLV3-27     | 0 | 0 | 1 | 0 | 0 | 0 | 16,7 | 0,17 | 12,165  | 1,37E-02 |
| A0A075B6K0 | HCG2041221 (Fragment) OS=Homo sapiens GN=IGLV3-16 PE=1 SV=1                               | IGLV3-16     | 0 | 0 | 1 | 0 | 0 | 0 | 16,7 | 0,17 | 12,466  | 1,34E-02 |
| P01764     | Immunoglobulin heavy variable 3-23 OS=Homo sapiens GN=IGHV3-23 PE=1 SV=2                  | IGHV3-23     | 1 | 0 | 0 | 0 | 0 | 0 | 16,7 | 0,17 | 12,582  | 1,32E-02 |
| A0A0C4DH42 | Protein IGHV3-66 (Fragment) OS=Homo sapiens GN=IGHV3-66 PE=4 SV=1                         | IGHV3-66     | 1 | 0 | 0 | 0 | 0 | 0 | 16,7 | 0,17 | 12,698  | 1,31E-02 |
| P01767     | Immunoglobulin heavy variable 3-53 OS=Homo sapiens GN=IGHV3-53 PE=1 SV=2                  | IGHV3-53     | 1 | 0 | 0 | 0 | 0 | 0 | 16,7 | 0,17 | 12,770  | 1,31E-02 |
| A0A0B4J1X5 | Protein IGHV3-74 (Fragment) OS=Homo sapiens GN=IGHV3-74 PE=1 SV=1                         | IGHV3-74     | 1 | 0 | 0 | 0 | 0 | 0 | 16,7 | 0,17 | 12,840  | 1,30E-02 |
| A0A075B7B8 | Protein IGHV3OR16-12 (Fragment) OS=Homo sapiens GN=IGHV3OR16-12 PE=1 SV=1                 | IGHV3OR16-12 | 1 | 0 | 0 | 0 | 0 | 0 | 16,7 | 0,17 | 12,875  | 1,29E-02 |
| A0A075B7E8 | Protein IGHV3OR16-13 (Fragment) OS=Homo sapiens GN=IGHV3OR16-13 PE=4 SV=1                 | IGHV3OR16-13 | 1 | 0 | 0 | 0 | 0 | 0 | 16,7 | 0,17 | 12,904  | 1,29E-02 |
| P01825     | Immunoglobulin heavy variable 4-59 OS=Homo sapiens GN=IGHV4-59 PE=1 SV=2                  | IGHV4-59     | 0 | 0 | 0 | 0 | 0 | 1 | 16,7 | 0,17 | 12,936  | 1,29E-02 |
| P01768     | Immunoglobulin heavy variable 3-30 OS=Homo sapiens GN=IGHV3-30 PE=1 SV=2                  | IGHV3-30     | 1 | 0 | 0 | 0 | 0 | 0 | 16,7 | 0,17 | 12,947  | 1,29E-02 |
| A0A0C4DH41 | Protein IGHV4-61 (Fragment) OS=Homo sapiens GN=IGHV4-61 PE=4 SV=1                         | IGHV4-61     | 0 | 0 | 0 | 0 | 0 | 1 | 16,7 | 0,17 | 13,066  | 1,28E-02 |
| P01772     | Immunoglobulin heavy variable 3-33 OS=Homo sapiens GN=IGHV3-33 PE=1 SV=2                  | IGHV3-33     | 1 | 0 | 0 | 0 | 0 | 0 | 16,7 | 0,17 | 13,074  | 1,27E-02 |
| P06331     | Immunoglobulin heavy variable 4-34 OS=Homo sapiens GN=IGHV4-34 PE=1 SV=2                  | IGHV4-34     | 0 | 0 | 0 | 0 | 0 | 1 | 16,7 | 0,17 | 13,815  | 1,21E-02 |
| P01824     | Immunoglobulin heavy variable 4-39 OS=Homo sapiens GN=IGHV4-39 PE=1 SV=2                  | IGHV4-39     | 0 | 0 | 0 | 0 | 0 | 1 | 16,7 | 0,17 | 13,917  | 1,20E-02 |
| Q96A08     | Histone H2B type 1-A OS=Homo sapiens GN=HIST1H2BA PE=1 SV=3                               | HIST1H2BA    | 1 | 0 | 0 | 0 | 0 | 0 | 16,7 | 0,17 | 14,167  | 1,18E-02 |
| O60361     | Putative nucleoside diphosphate kinase OS=Homo sapiens GN=NME2P1 PE=5 SV=1                | NME2P1       | 0 | 1 | 0 | 0 | 0 | 0 | 16,7 | 0,17 | 15,529  | 1,07E-02 |
| P22392     | Nucleoside diphosphate kinase B OS=Homo sapiens GN=NME2 PE=1 SV=1                         | NME2         | 0 | 1 | 0 | 0 | 0 | 0 | 16,7 | 0,17 | 17,298  | 9,64E-03 |
| Q969E4     | Transcription elongation factor A protein-like 3 OS=Homo sapiens GN=TCEAL3 PE=1 SV=1      | TCEAL3       | 1 | 0 | 0 | 0 | 0 | 0 | 16,7 | 0,17 | 22,502  | 7,41E-03 |
| P09211     | Glutathione S-transferase P OS=Homo sapiens GN=GSTP1 PE=1 SV=2                            | GSTP1        | 0 | 0 | 1 | 0 | 0 | 0 | 16,7 | 0,17 | 23,356  | 7,14E-03 |
| P23284     | Peptidyl-prolyl cis-trans isomerase B OS=Homo sapiens GN=PPIB PE=1 SV=2                   | PPIB         | 0 | 1 | 0 | 0 | 0 | 0 | 16,7 | 0,17 | 23,743  | 7,02E-03 |
| P08294     | Extracellular superoxide dismutase [Cu-Zn] OS=Homo sapiens GN=SOD3 PE=1 SV=2              | SOD3         | 1 | 0 | 0 | 0 | 0 | 0 | 16,7 | 0,17 | 25,851  | 6,45E-03 |
| P22692     | Insulin-like growth factor-binding protein 4 OS=Homo sapiens GN=IGFBP4 PE=1 SV=2          | IGFBP4       | 0 | 0 | 1 | 0 | 0 | 0 | 16,7 | 0,17 | 27,934  | 5,97E-03 |
| G3V5Z7     | Proteasome subunit alpha type OS=Homo sapiens GN=PSMA6 PE=1 SV=1                          | PSMA6        | 1 | 0 | 0 | 0 | 0 | 0 | 16,7 | 0,17 | 28,147  | 5,92E-03 |
| Q16270     | Insulin-like growth factor-binding protein 7 OS=Homo sapiens GN=IGFBP7 PE=1 SV=1          | IGFBP7       | 0 | 0 | 0 | 0 | 0 | 1 | 16,7 | 0,17 | 29,130  | 5,72E-03 |
| Q32Q12     | Nucleoside diphosphate kinase OS=Homo sapiens GN=NME1-NME2 PE=1 SV=1                      | NME1-NME2    | 0 | 1 | 0 | 0 | 0 | 0 | 16,7 | 0,17 | 32,642  | 5,11E-03 |
| Q99598     | Translin-associated protein X OS=Homo sapiens GN=TSNAX PE=1 SV=1                          | TSNAX        | 0 | 1 | 0 | 0 | 0 | 0 | 16,7 | 0,17 | 33,112  | 5,03E-03 |
| P08758     | Annexin A5 OS=Homo sapiens GN=ANXA5 PE=1 SV=2                                             | ANXA5        | 0 | 0 | 1 | 0 | 0 | 0 | 16,7 | 0,17 | 35,937  | 4,64E-03 |
| P40925     | Malate dehydrogenase, cytoplasmic OS=Homo sapiens GN=MDH1 PE=1 SV=4                       | MDH1         | 0 | 0 | 0 | 1 | 0 | 0 | 16,7 | 0,17 | 36,426  | 4,58E-03 |
| M0QXB4     | Coatomer protein complex, subunit epsilon, isoform CRA_g OS=Homo sapiens GN=COF           | COPE         | 0 | 0 | 1 | 0 | 0 | 0 | 16,7 | 0,17 | 36,924  | 4,51E-03 |
| Q02985     | Complement factor H-related protein 3 OS=Homo sapiens GN=CFHR3 PE=1 SV=2                  | CFHR3        | 1 | 0 | 0 | 0 | 0 | 0 | 16,7 | 0,17 | 37,323  | 4,47E-03 |
| P04083     | Annexin A1 OS=Homo sapiens GN=ANXA1 PE=1 SV=2                                             | ANXA1        | 0 | 0 | 0 | 1 | 0 | 0 | 16,7 | 0,17 | 38,714  | 4,31E-03 |
| Q8N987     | N-terminal EF-hand calcium-binding protein 1 OS=Homo sapiens GN=NECAB1 PE=1 SV=1          | NECAB1       | 0 | 1 | 0 | 0 | 0 | 0 | 16,7 | 0,17 | 40,571  | 4,11E-03 |
| P08476     | Inhibin beta A chain OS=Homo sapiens GN=INHBA PE=1 SV=2                                   | INHBA        | 0 | 0 | 1 | 0 | 0 | 0 | 16,7 | 0,17 | 47,442  | 3,51E-03 |
| P04350     | Tubulin beta-4A chain OS=Homo sapiens GN=TUBB4A PE=1 SV=2                                 | TUBB4A       | 0 | 0 | 0 | 1 | 0 | 0 | 16,7 | 0,17 | 49,586  | 3,36E-03 |
| Q3ZCM7     | Tubulin beta-8 chain OS=Homo sapiens GN=TUBB8 PE=1 SV=2                                   | TUBB8        | 0 | 0 | 0 | 1 | 0 | 0 | 16,7 | 0,17 | 49,776  | 3,35E-03 |
| Q9BUF5     | Tubulin beta-6 chain OS=Homo sapiens GN=TUBB6 PE=1 SV=1                                   | TUBB6        | 0 | 0 | 0 | 1 | 0 | 0 | 16,7 | 0,17 | 49,857  | 3,34E-03 |
| P13489     | Ribonuclease inhibitor OS=Homo sapiens GN=RNH1 PE=1 SV=2                                  | RNH1         | 0 | 0 | 0 | 0 | 0 | 1 | 16,7 | 0,17 | 49,973  | 3,34E-03 |
| Q9P2R7     | Succinate--CoA ligase [ADP-forming] subunit beta, mitochondrial OS=Homo sapiens GN=SUCLA2 | SUCLA2       | 1 | 0 | 0 | 0 | 0 | 0 | 16,7 | 0,17 | 50,317  | 3,31E-03 |
| Q05639     | Elongation factor 1-alpha 2 OS=Homo sapiens GN=EEF1A2 PE=1 SV=1                           | EEF1A2       | 0 | 0 | 0 | 0 | 1 | 0 | 16,7 | 0,17 | 50,470  | 3,30E-03 |
| P01008     | Antithrombin-III OS=Homo sapiens GN=SERPINC1 PE=1 SV=1                                    | SERPINC1     | 0 | 0 | 0 | 0 | 0 | 1 | 16,7 | 0,17 | 52,602  | 3,17E-03 |
| Q9NZP8     | Complement C1r subcomponent-like protein OS=Homo sapiens GN=C1RL PE=1 SV=2                | C1RL         | 0 | 0 | 0 | 1 | 0 | 0 | 16,7 | 0,17 | 53,498  | 3,12E-03 |
| P53985     | Monocarboxylate transporter 1 OS=Homo sapiens GN=SLC16A1 PE=1 SV=3                        | SLC16A1      | 1 | 0 | 0 | 0 | 0 | 0 | 16,7 | 0,17 | 53,944  | 3,09E-03 |
| C9JIZ6     | Prosaposin OS=Homo sapiens GN=PSAP PE=1 SV=2                                              | PSAP         | 0 | 1 | 0 | 0 | 0 | 0 | 16,7 | 0,17 | 58,441  | 2,85E-03 |
| P09603     | Macrophage colony-stimulating factor 1 OS=Homo sapiens GN=CSF1 PE=1 SV=2                  | CSF1         | 0 | 0 | 0 | 0 | 0 | 1 | 16,7 | 0,17 | 60,179  | 2,77E-03 |
| Q96PD5     | N-acetylmuramoyl-L-alanine amidase OS=Homo sapiens GN=PGLYRP2 PE=1 SV=1                   | PGLYRP2      | 1 | 0 | 0 | 0 | 0 | 0 | 16,7 | 0,17 | 62,217  | 2,68E-03 |
| Q08357     | Sodium-dependent phosphate transporter 2 OS=Homo sapiens GN=SLC20A2 PE=1 SV=1             | SLC20A2      | 0 | 0 | 0 | 0 | 1 | 0 | 16,7 | 0,17 | 70,392  | 2,37E-03 |
| Q96M02     | Centrosomal protein C10orf90 OS=Homo sapiens GN=C10orf90 PE=2 SV=2                        | C10orf90     | 0 | 0 | 0 | 0 | 0 | 1 | 16,7 | 0,17 | 77,910  | 2,14E-03 |
| P33991     | DNA replication licensing factor MCM4 OS=Homo sapiens GN=MCM4 PE=1 SV=5                   | MCM4         | 0 | 1 | 0 | 0 | 0 | 0 | 16,7 | 0,17 | 96,558  | 1,73E-03 |
| Q76M96     | Coiled-coil domain-containing protein 80 OS=Homo sapiens GN=CCDC80 PE=1 SV=1              | CCDC80       | 0 | 1 | 0 | 0 | 0 | 0 | 16,7 | 0,17 | 108,174 | 1,54E-03 |
| Q62MN7     | PDZ domain-containing RING finger protein 4 OS=Homo sapiens GN=PDZRN4 PE=2 SV=1           | PDZRN4       | 0 | 0 | 1 | 0 | 0 | 0 | 16,7 | 0,17 | 117,103 | 1,42E-03 |
| Q5T0N1     | Cilia- and flagella-associated protein 70 OS=Homo sapiens GN=CFAP70 PE=2 SV=3             | CFAP70       | 0 | 0 | 0 | 1 | 0 | 0 | 16,7 | 0,17 | 125,721 | 1,33E-03 |

Table S6

|        |                                                                            |         |   |   |   |   |   |   |      |      |         |          |
|--------|----------------------------------------------------------------------------|---------|---|---|---|---|---|---|------|------|---------|----------|
| Q6ZU80 | Centrosomal protein of 128 kDa OS=Homo sapiens GN=CEP128 PE=1 SV=2         | CEP128  | 0 | 0 | 1 | 0 | 0 | 0 | 16,7 | 0,17 | 128,015 | 1,30E-03 |
| P14543 | Nidogen-1 OS=Homo sapiens GN=NID1 PE=1 SV=3                                | NID1    | 0 | 1 | 0 | 0 | 0 | 0 | 16,7 | 0,17 | 136,377 | 1,22E-03 |
| P08603 | Complement factor H OS=Homo sapiens GN=CFH PE=1 SV=4                       | CFH     | 1 | 0 | 0 | 0 | 0 | 0 | 16,7 | 0,17 | 139,096 | 1,20E-03 |
| Q562F6 | Shugoshin 2 OS=Homo sapiens GN=SGO2 PE=1 SV=2                              | SGO2    | 0 | 0 | 1 | 0 | 0 | 0 | 16,7 | 0,17 | 144,739 | 1,15E-03 |
| P39060 | Collagen alpha-1(XVIII) chain OS=Homo sapiens GN=COL18A1 PE=1 SV=5         | COL18A1 | 0 | 0 | 0 | 0 | 1 | 0 | 16,7 | 0,17 | 178,188 | 9,35E-04 |
| E9PHH0 | Methyl-CpG-binding domain protein 5 OS=Homo sapiens GN=MBD5 PE=1 SV=1      | MBD5    | 1 | 0 | 0 | 0 | 0 | 0 | 16,7 | 0,17 | 183,683 | 9,07E-04 |
| E7EX88 | Aggrecan core protein OS=Homo sapiens GN=ACAN PE=1 SV=2                    | ACAN    | 0 | 0 | 1 | 0 | 0 | 0 | 16,7 | 0,17 | 261,329 | 6,38E-04 |
| A2RRP1 | Neuroblastoma-amplified sequence OS=Homo sapiens GN=NBAS PE=1 SV=2         | NBAS    | 0 | 0 | 0 | 1 | 0 | 0 | 16,7 | 0,17 | 268,571 | 6,21E-04 |
| Q7Z2Y8 | Interferon-induced very large GTPase 1 OS=Homo sapiens GN=GVINP1 PE=2 SV=2 | GVINP1  | 0 | 1 | 0 | 0 | 0 | 0 | 16,7 | 0,17 | 279,048 | 5,97E-04 |
| Q86YZ3 | Homerin OS=Homo sapiens GN=HRNR PE=1 SV=2                                  | HRNR    | 0 | 0 | 0 | 0 | 0 | 1 | 16,7 | 0,17 | 282,390 | 5,90E-04 |
| Q9NR99 | Matrix-remodeling-associated protein 5 OS=Homo sapiens GN=MXRA5 PE=2 SV=3  | MXRA5   | 0 | 0 | 0 | 0 | 0 | 1 | 16,7 | 0,17 | 312,150 | 5,34E-04 |
| Q01484 | Ankyrin-2 OS=Homo sapiens GN=ANK2 PE=1 SV=4                                | ANK2    | 1 | 0 | 0 | 0 | 0 | 0 | 16,7 | 0,17 | 433,715 | 3,84E-04 |
